# Supplementary material for: Unexpected alkyl isomerization at the silicon ligand of an unsaturated Rh complex: combined experiment and theory
Source: Royal Society of Chemistry journal article supplement (doi:10.1039/d3dt02087h), 2023-01-01
Supplement: d3dt02087h1.pdf [file d3dt02087h1.pdf]

## *Supporting information for*

### **Unexpected alkyl isomerization at the silicon ligand of an unsaturated Rh complex: combined experiment and theory**

Niroshani S. Abeynayake,<sup>†</sup> Nghia Le,<sup>†</sup> Gabriela Sanchez-Lecuona, Bruno  
Donnadieu, Charles Edwin Webster,<sup>\*</sup> and Virginia Montiel-Palma<sup>\*</sup>

Department of Chemistry, Mississippi State University, Box 9573, Mississippi State, Mississippi  
39762, United States

Emails: [ewebster@chemistry.msstate.edu](mailto:ewebster@chemistry.msstate.edu) and [vmontiel@chemistry.msstate.edu](mailto:vmontiel@chemistry.msstate.edu)

# Table of Contents

|     |                                                                                                                                                                                                                                                  |     |
|-----|--------------------------------------------------------------------------------------------------------------------------------------------------------------------------------------------------------------------------------------------------|-----|
| 1   | Experimental details.....                                                                                                                                                                                                                        | S3  |
| 1.1 | Isolation of complex $[\mu\text{-Cl-Rh}\{\kappa^3(P,Si,Si)\text{PPh}(o\text{-C}_6\text{H}_4\text{CH}_2\text{Si}^i\text{Pr})\text{CH}_2\text{CH}_2\text{CH}_3)(o\text{-C}_6\text{H}_4\text{CH}_2\text{Si}^i\text{Pr}_2)]_2$ ( <b>Rh-3</b> ) ..... | S3  |
| 1.2 | Formation of $[\mu\text{-Cl-Rh}\{\kappa^3(P,Si,C)\text{PPh}(o\text{-C}_6\text{H}_4\text{CH}_2\text{Si}^i\text{PrO Si}^i\text{Pr}_2\text{CH-}o\text{-C}_6\text{H}_4)]_2$ ( <b>Rh-4</b> ) in the presence of adventitious water.....               | S4  |
| 2   | NMR spectra .....                                                                                                                                                                                                                                | S7  |
| 2.1 | NMR spectra of complex <b>Rh-3</b> .....                                                                                                                                                                                                         | S7  |
| 2.2 | NMR spectra for <b>Rh-4</b> .....                                                                                                                                                                                                                | S10 |
| 3   | X-ray diffraction analysis data for the complexes .....                                                                                                                                                                                          | S12 |
| 3.1 | X-ray diffraction data of complex <b>Rh-3</b> (CCDC 2133159) .....                                                                                                                                                                               | S12 |
| 3.2 | X-ray diffraction data of complex <b>Rh-4</b> (CCDC 2133161) .....                                                                                                                                                                               | S21 |
| 4   | Computational details .....                                                                                                                                                                                                                      | S32 |
| 5   | References .....                                                                                                                                                                                                                                 | S39 |

## 1 Experimental details

All experiments were performed under an argon atmosphere using standard Schlenk methods or in an MBraun glove box. Toluene and pentane were dried and purified over MBraun column systems. Benzene- $d_6$  and toluene- $d_8$  were passed through a Pasteur pipette containing molecular sieves and basic alumina and then degassed via three freeze–pump–thaw cycles and stored over molecular sieves. Other NMR solvents were used as received.  $[\text{RhCl}(\text{COD})]_2$ <sup>1</sup> and  $\text{PhP}(o\text{-C}_6\text{H}_4\text{CH}_2\text{Si}^i\text{Pr}_2\text{H})_2$ <sup>2</sup> were synthesized according to reported procedures. Nuclear magnetic resonance (NMR) experiments were performed on Bruker Avance 500 MHz and 600 MHz spectrometers operating with frequency, deuterated solvent and temperature indicated in parentheses. Chemical shifts ( $\delta$ ) are reported in parts per million (ppm).

### 1.1 Isolation of complex $[\mu\text{-Cl-Rh}\{\kappa^3(\text{P},\text{Si},\text{Si})\text{PPh}(o\text{-C}_6\text{H}_4\text{CH}_2\text{Si}^i\text{Pr})\text{CH}_2\text{CH}_2\text{CH}_3\})(o\text{-C}_6\text{H}_4\text{CH}_2\text{Si}^i\text{Pr}_2)]_2$ (**Rh-3**)

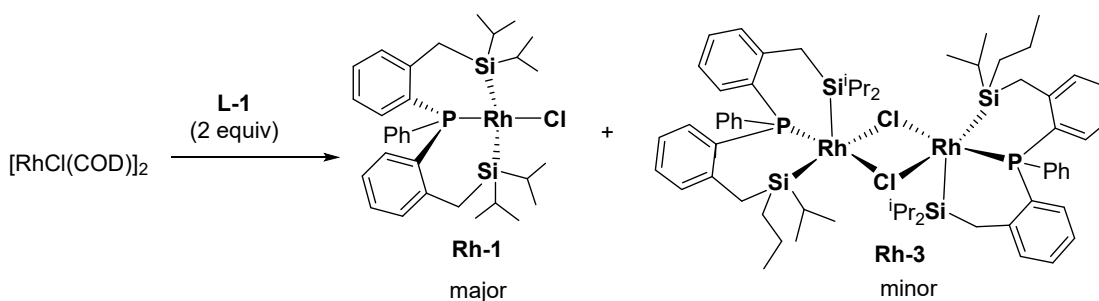

We previously reported the synthesis of complex **Rh-1** from the reaction of  $[\text{RhCl}(\text{COD})]_2$  (47 mg, 0.097mmol) and **L-1** (100 mg, 0.19 mmol) in toluene.<sup>2</sup> After stirring for 3 h, the solution was concentrated and crystals of **Rh-1** were obtained in 70-73% isolated yield. The remaining mother liquor was dried under vacuum and redissolved in pentane. Orange crystals of complex **Rh-3** were grown. The isolated yield of **Rh-3** was 8-10 mg, corresponding to 13-15% isolated yield (with respect to Rh). Small amounts of **Rh-1** are still present in the recrystallized sample. <sup>1</sup>H NMR (600 MHz, C<sub>6</sub>D<sub>6</sub>, 298 K):  $\delta$  7.04 – 6.84 (m, 21H, CH<sub>arom</sub>), 6.77 – 6.71 (m, 5H, CH<sub>arom</sub>), 2.30 – 2.23 (m, 4H, CH<sub>2</sub>), 2.14 (dd,  $J_{\text{HH}} = 14.6$ ,  $J_{\text{HP}} = 2.9$  Hz, 2H, CH<sub>2</sub>), 2.03 (d,  $J_{\text{HH}} = 14.4$  Hz, 2H, CH<sub>2</sub>), 2.01 – 1.86 (m, 2H,

CH-*i*Pr), 1.77 – 1.63 (m, 4H, CH-*i*Pr), 1.61 (d,  $J_{\text{HH}} = 7.2$  Hz, 6H, CH<sub>3</sub>-*i*Pr), 1.58-1.51 (m, 4H, CH<sub>2</sub>-Propyl), 1.32 (ddd,  $J_{\text{HH}} = 14.6$ ,  $J_{\text{HH}} = 12.7$ ,  $J_{\text{HP}} = 3.9$  Hz, 4H, CH<sub>2</sub>-Propyl, overlapped), 1.19 (d,  $J_{\text{HH}} = 7.5$  Hz, 6H, CH<sub>3</sub>-*i*Pr), 1.13 (d,  $J_{\text{HH}} = 7.3$  Hz, 6H, CH<sub>3</sub>-*i*Pr), 1.08 (d,  $J_{\text{HH}} = 7.4$  Hz, 6H, CH<sub>3</sub>-*i*Pr), 1.01 (d,  $J_{\text{HH}} = 7.5$  Hz, 6H, CH<sub>3</sub>-*i*Pr), 0.99 - 0.96 (overlapped signals: 12H, CH<sub>3</sub>-*i*Pr (6H) and CH<sub>3</sub>-Propyl (6H)) ppm. **DEPT <sup>13</sup>C{<sup>1</sup>H} NMR (150.9 MHz, C<sub>6</sub>D<sub>6</sub>):** 24.02 (d,  $J_{\text{CP}} = 16.9$  Hz, CH<sub>2</sub>), 23.07 (d,  $J_{\text{CP}} = 18.3$  Hz, CH<sub>2</sub>), 21.94 (s, CH<sub>3</sub>, *i*Pr), 20.88 (s, CH<sub>2</sub>, *n*-Propyl), 20.59 (s, CH, *i*Pr), 20.53 (s, CH, *i*Pr), 20.28 (s, CH<sub>3</sub>, *i*Pr), 20.07 (s, CH<sub>3</sub>, *i*Pr), 19.87 (s, CH<sub>3</sub>, *n*-Propyl), 19.20 (s, CH<sub>3</sub>, *i*Pr), 18.84 (s, CH<sub>2</sub>, *n*-Propyl), 18.51 (s, CH<sub>3</sub>, *i*Pr), 18.41 (s, CH<sub>3</sub>, *n*-Propyl) ppm. **<sup>31</sup>P{<sup>1</sup>H} NMR (202.46 MHz, C<sub>6</sub>D<sub>6</sub>):** 31.5 (d,  $J_{\text{PRh}} = 145.7$  Hz) ppm. Anal. Calcd. For C<sub>32</sub>H<sub>45</sub>RhCIPSi<sub>2</sub>: C, 58.66%; H, 6.92%. Found: C, 57.23%; H, 5.90%. The deviation in the C and H values for microanalysis maybe due to small decomposition of the **Rh-3** sample as the microanalyses we carried out. The sample also contains isomer **Rh-1** with the same formula.

## 1.2 Formation of $[\mu\text{-Cl-Rh}\{\kappa^3(P, Si, C)PPh(o\text{-C}_6\text{H}_4\text{CH}_2\text{Si}^i\text{PrO Si}^i\text{Pr}_2\text{CH-o-C}_6\text{H}_4)\}]_2$ (**Rh-4**) in the presence of adventitious water

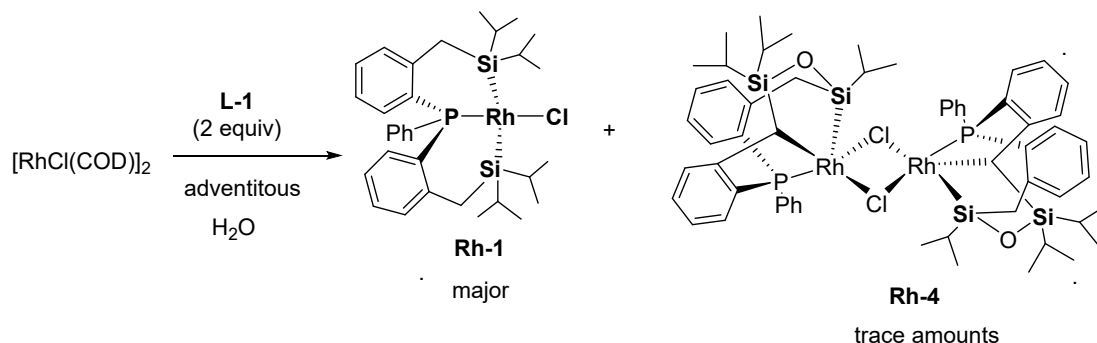

Following the procedure described in Section 1.1 above, 47 mg (0.097mmol) of  $[\text{RhCl}(\text{COD})]_2$  and 100 mg of **L-1** (0.19 mmol) in 2 mL of not-freshly dried toluene (with trace amounts of water) rendered crystals of **Rh-1** which were subsequently removed. The volatiles were dried under vacuum and redissolved in pentane from which yellow crystals of complex **Rh-4** were obtained. The crystals were suitable for X-ray diffraction analysis. Isolated yield 6 mg, 5%. **<sup>1</sup>H NMR (500 MHz, C<sub>6</sub>D<sub>6</sub>, 298 K):**  $\delta$  7.48 – 7.37 (m, 5H, CH<sub>arom</sub>), 7.13 – 6.97 (m, 31H, CH<sub>arom</sub>), 2.58 – 2.24 (m, 4H, CH<sub>2</sub>), 1.80 (sept,  $J_{\text{HH}} = 7.1$  Hz, 4H, CH-*i*Pr), 1.49 (d,  $J_{\text{HH}} = 7.6$  Hz, 6H, CH<sub>3</sub>-*i*Pr), 1.41 (d,  $J_{\text{HH}} = 6.8$  Hz, 6H, CH<sub>3</sub>-*i*Pr), 0.84 (d,  $J_{\text{HH}} = 7.5$  Hz, 12H, CH<sub>3</sub>-*i*Pr), 0.60 (d,  $J_{\text{HH}} = 7.4$  Hz, 6H, CH<sub>3</sub>-*i*Pr), 0.38 (d,  $J_{\text{HH}} = 7.5$

Hz, 6H, CH<sub>3</sub>-<sup>*i*</sup>Pr), 0.10 – 0.02 (m, 2H, CH-<sup>*i*</sup>Pr), ppm. <sup>31</sup>P{<sup>1</sup>H} NMR (202.46 MHz, C<sub>6</sub>D<sub>6</sub>): 49.04 (d,  $J_{\text{PRh}} = 164.0$  Hz) ppm. Attempts to generate this complex from stoichiometric water addition to either **Rh-1** or **Rh-3** were not successful and instead other unidentified compounds were formed. Attempts at deliberate addition of drops of water to the synthesis reaction did not further improve the yield but only the same unidentified compounds were formed and **Rh-4** in approximately the same yield. Fresh rigorously dried toluene did not lead to the observation of **Rh-4**. Complex **Rh-4** is thus generated in the presence of adventitious water. We were unable to obtain successful microanalysis of this complex as the separation of this complex from the major product **Rh-1** proved impossible in our hands.

The X-ray diffraction structure (**Figure 1** in the main text) discloses a symmetric dichloro-bridged dimetallic species with modified ligands. The coordination geometry around each Rh center can be described as distorted square pyramidal. Each pentacoordinated Rh(III) metal center is bound to the phosphorous atom, a benzylic carbon and only one silicon atom of the ligand. The new Rh-C bonds result from intramolecular benzylic C-H activation of the formerly methylene carbon. The Si atom bound to Rh bears only one isopropyl substituent whereas the other silicon atom, alpha to the cyclometalated C, no longer binds to Rh but instead to O, forming part of a Si-O-Si motif. The bond lengths and angles are within the expected ranges of other siloxanes.<sup>3-5</sup> The formation of Si-O-Si complexes has been reported by several authors (**Chart S1**). For example, oxidation of the Pt disilene complex [(PR<sub>3</sub>)<sub>2</sub>Pt-η<sup>2</sup>(Mes<sub>2</sub>Si=SiMes<sub>2</sub>)]<sup>6</sup> by West and coworkers, and dehydrogenative condensation on [(dmpe)Pt(SiHPh<sub>2</sub>)<sub>2</sub>] upon reaction with water by Osakada and coworkers,<sup>7</sup> rendered four-membered Si-O-Si platinacycle units. Ozerov and coworkers reported Si-O-Si motifs bridging two Pt units from reaction of adventitious water with three-coordinate cationic Pt-PSiP,<sup>8</sup> in a variation of Milstein's saturated Cl-Pt-PSiP system, in which the rearrangement of a pincer silanol Pt complex in the presence of water and a non-nucleophilic base led to a binuclear complex bearing a Si-O-Si-O motif bridging two Pt centers.<sup>9</sup> Adventitious water also reacts with a terminal silylene<sup>10</sup> or σ(Si-H) complexes<sup>11</sup> forming bimetallic Si-O-Si bridges spanning two Ir or Rh centers as reported by Tilley and coworkers (**Chart S1**).

In our case, stoichiometric addition of water to either **Rh-1** or **Rh-3** does not lead to the formation of **Rh-4** but instead, other unidentified products are generated. We thus propose that complex **Rh-4** is also formed during the metalation process from the reaction of one of the intermediate species with adventitious water.

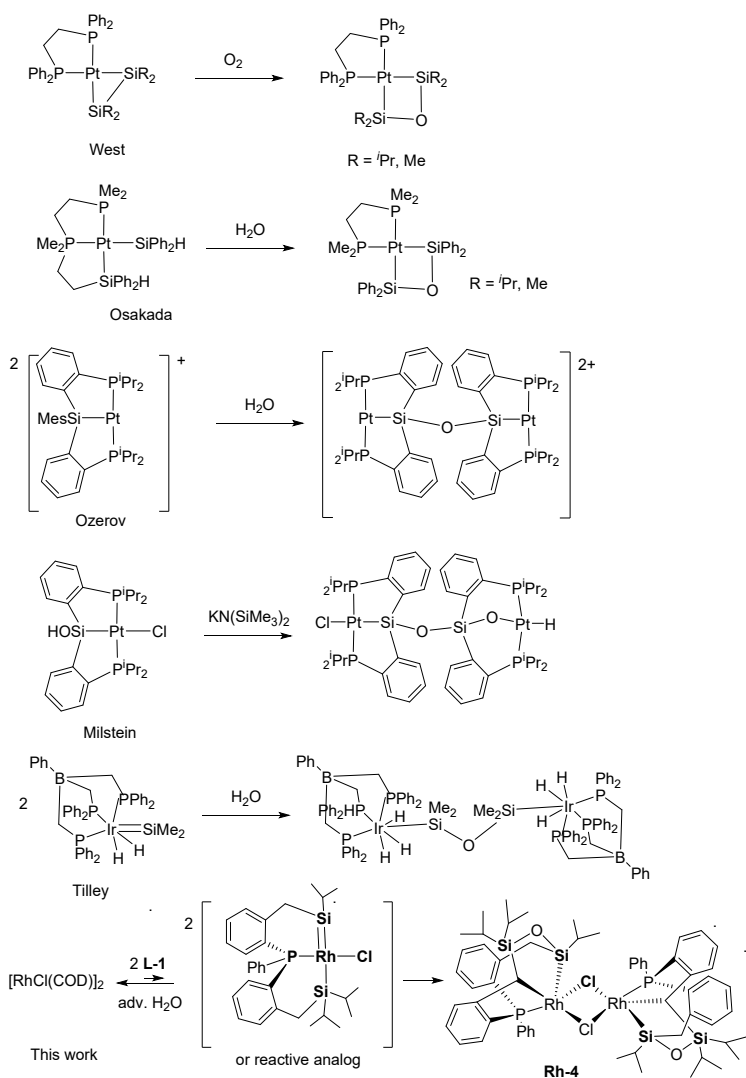

**Chart S1.** Some examples of the formation of complexes containing Si-O-Si motifs.

## 2 NMR spectra

### 2.1 NMR spectra of complex **Rh-3**

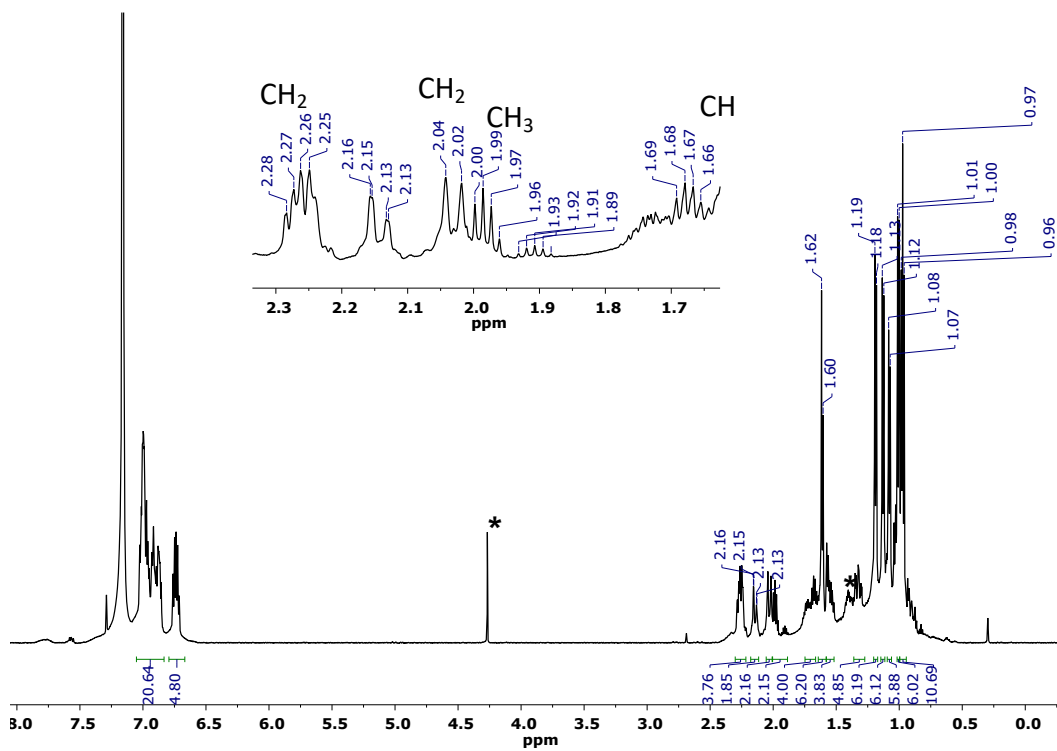

**Figure S1.**  $^1\text{H}$  NMR spectrum (600 MHz,  $\text{C}_6\text{D}_6$ , 298 K) of **Rh-3** (\*=DCM and pentane remaining from synthesis). Small amounts of **Rh-1** were present in the sample.

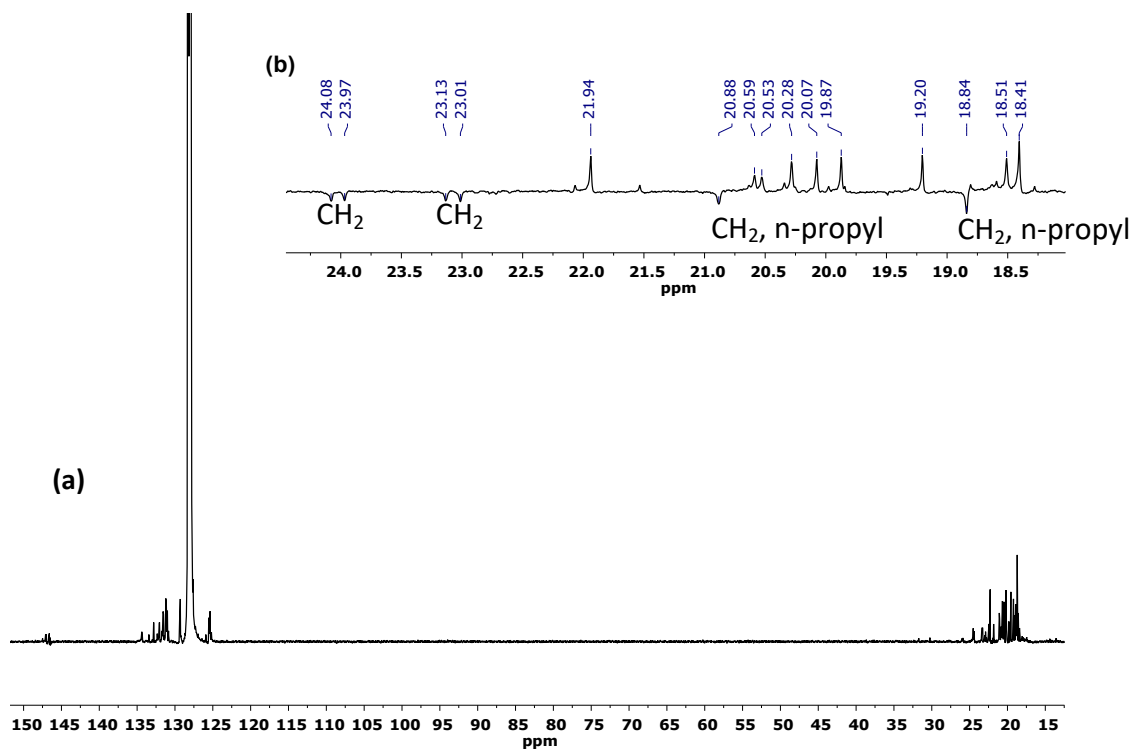

**Figure S2.** (a)  $^{13}\text{C}\{^1\text{H}\}$  NMR spectrum (150.9 MHz,  $\text{C}_6\text{D}_6$ , 298 K) of **Rh-3**. (b) DEPT- $^{13}\text{C}\{^1\text{H}\}$  NMR spectrum (150.9 MHz,  $\text{C}_6\text{D}_6$ , 298 K) of **Rh-3**. Small amounts of **Rh-1** were present in the sample.



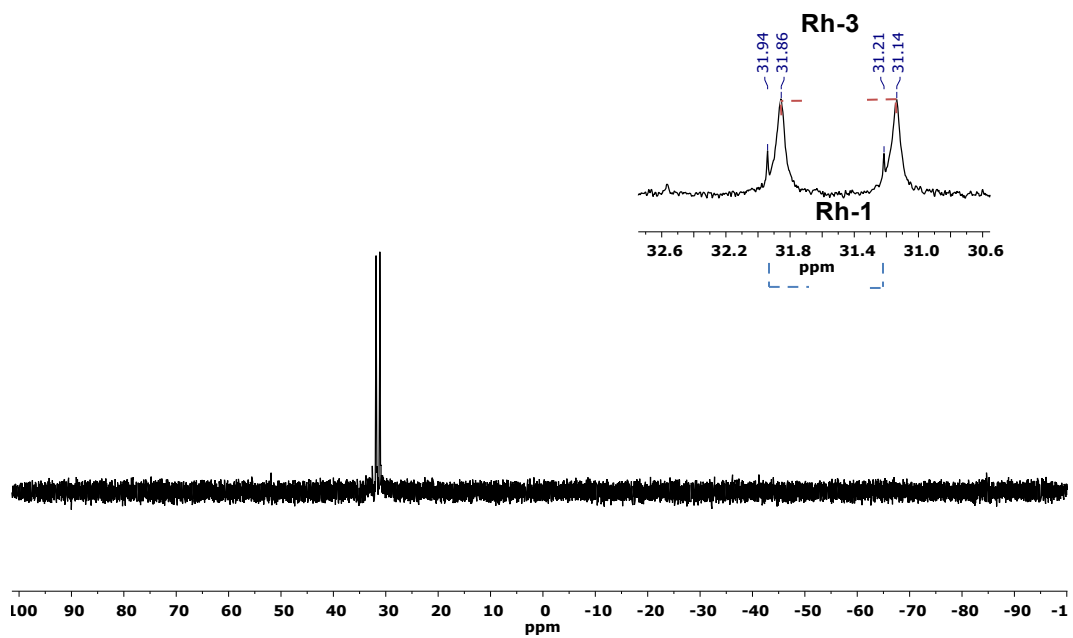

**Figure S3.**  $^{31}\text{P}\{^1\text{H}\}$  NMR spectrum (202.46 MHz,  $\text{C}_6\text{D}_6$ , 298 K) of **Rh-3**. Small amounts of **Rh-1** were present in the sample.

## 2.2 NMR spectra for **Rh-4**

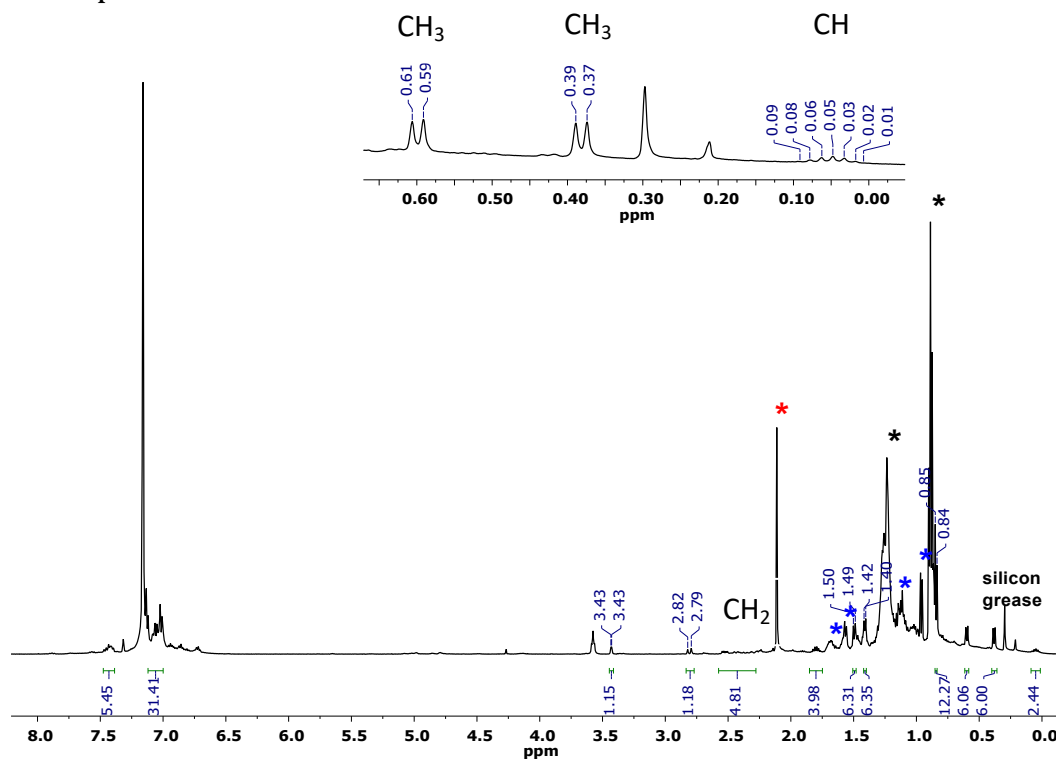

**Figure S4.**  $^1\text{H}$  NMR spectrum (500 MHz,  $\text{C}_6\text{D}_6$ , 298 K) of **Rh-4** (\*=pentane, \*=Toluene, \*=**Rh-1**). This complex is not isolated pure but **Rh-1** co-crystallizes with it.

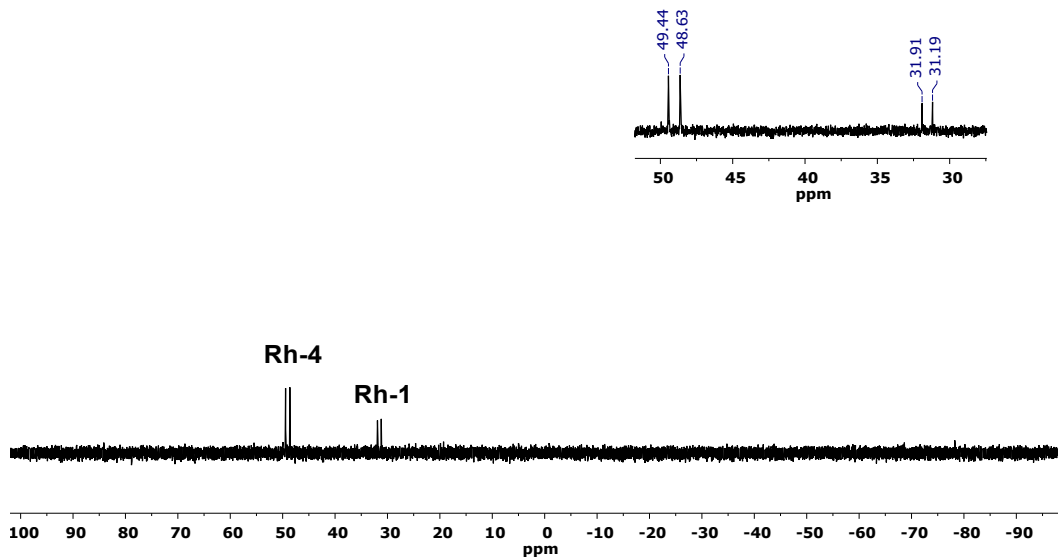

**Figure S5.**  $^{31}\text{P}\{^1\text{H}\}$  NMR spectrum (202.46 MHz,  $\text{C}_6\text{D}_6$ , 278 K) of **Rh-4** showing also the presence of **Rh-1**.

### 3 X-ray diffraction analysis data for the complexes

#### 3.1 X-ray diffraction data of complex **Rh-3** (CCDC 2133159)

##### Crystal Structure Report for A\_VM\_018

An orange prism single crystal of  $C_{32}H_{45}ClPRhSi_2$ , approximate dimensions (0.110 x 0.176 x 0.234) mm<sup>3</sup>, was selected for the X-ray crystallographic analysis and mounted on a cryo-loop using an oil cryo-protectant. The X-ray intensity data was measured at low temperature (T = 100K), using a three circles goniometer Kappa geometry with a fixed Kappa angle at = 54.74 deg Bruker AXS D8 Venture, equipped with a Photon 100 CMOS active pixel sensor detector. A monochromatized Mo X-ray radiation ( $\lambda = 0.71073 \text{ \AA}$ ) was selected for the measurement. Frames were integrated with the Bruker SAINT using a narrow-frame algorithm.<sup>12,13</sup> The integration of the data using an orthorhombic unit cell yielded a total of 99234 reflections to a maximum  $\theta$  angle of 32.03° (0.67 Å resolution), of which 10715 were independent (average redundancy 9.261, completeness = 99.4%,  $R_{int} = 4.18\%$ ,  $R_{sig} = 2.39\%$ ) and 8971 (83.72%) were greater than  $2\sigma$  ( $F^2$ ). The final cell constants of  $a = 19.691(7) \text{ \AA}$ ,  $b = 15.587(7) \text{ \AA}$ ,  $c = 20.196(9) \text{ \AA}$ , volume = 6199. (4) Å<sup>3</sup>, are based upon the refinement of the XYZ-centroids of 1261 reflections above  $20 \sigma$  (I) with  $4.526^\circ < 2\theta < 43.11^\circ$ . Data were corrected for absorption effects using the multi-Scan method implemented in the software (SADABS). The ratio of minimum to maximum apparent transmission was 0.874. The calculated minimum and maximum transmission coefficients (based on crystal size) are 0.8370 and 0.9180. The structure was solved in an orthorhombic unit cell, Space Group: P b c a, with Z = 8 for the formula unit,  $C_{32}H_{45}ClPRhSi_2$  using the Bruker SHELXT Software.<sup>14</sup> The asymmetric unit was built on half of molecule, the entire model being generated by an inversion center. Refinement of the structure was carried out by least squares procedures on weighted  $F^2$  values using the SHELXTL-2018/3<sup>15</sup> included in the APEX3 v2018, 7.0, AXS Bruker program.<sup>16</sup> All hydrogen atoms were localized on difference Fourier maps but then introduced in the refinement as fixed contributors in idealized geometry with an isotropic thermal parameter fixed at 20% higher than those carbons atoms they were connected. The final anisotropic full-matrix least-squares refinement on  $F^2$  with 341 variables converged at  $R1 = 3.16\%$ , for the observed data and  $wR2 = 8.94\%$  for all data. The goodness-of-fit: GOF was 1.062. The largest peak in the final

difference electron density synthesis was  $1.004 \text{ e}^-/\text{\AA}^3$  and the largest hole was  $-0.595 \text{ e}^-/\text{\AA}^3$  with an RMS deviation of  $0.118 \text{ e}^-/\text{\AA}^3$ . On the basis of the final model, the calculated density was  $1.404 \text{ g/cm}^3$  and  $F(000)$ , 2736 e. Graphics were performed using softwares: Mercury V.4.2.0: (<https://www.ccdc.cam.ac.uk/>) and POV-Ray v 3.7: (The Persistence of Vision Raytracer, high quality, Free Software tool).

***Molecule's view:***

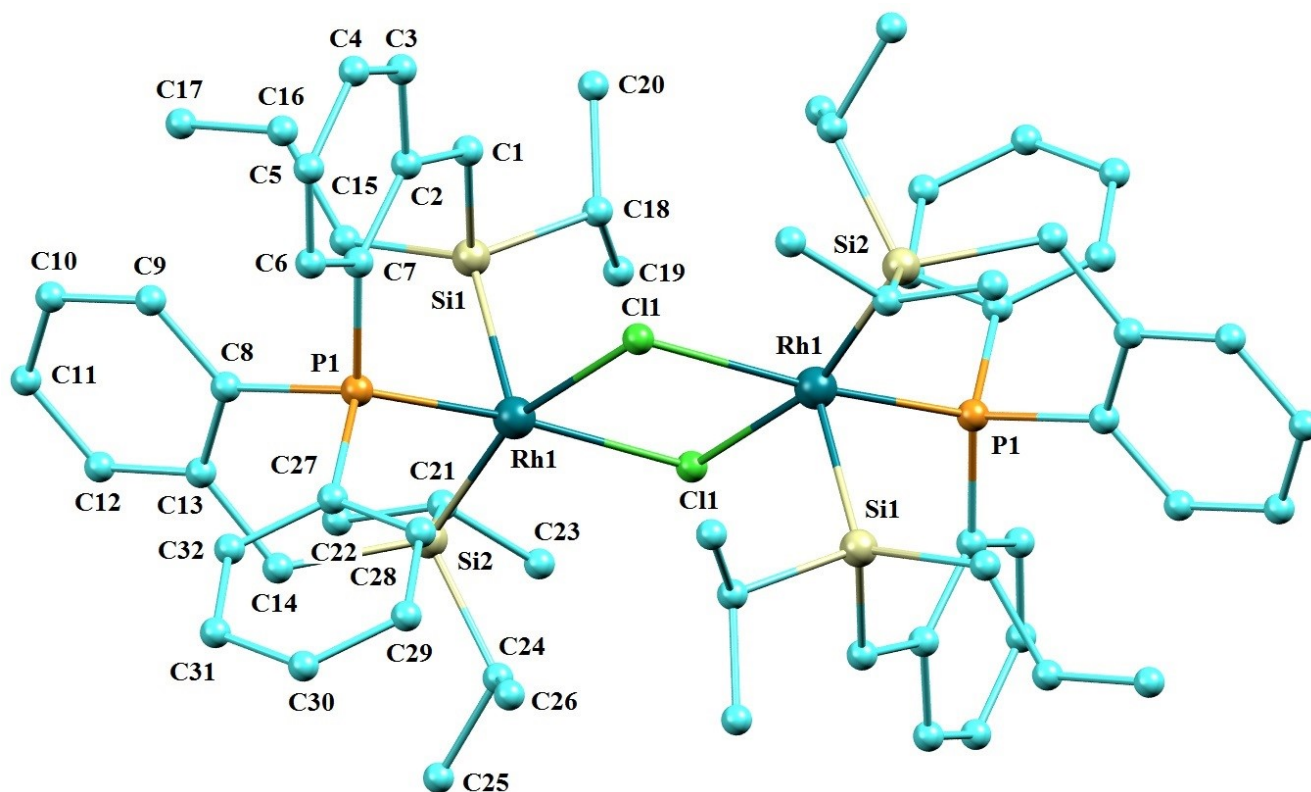

**Figure S6.** Asymmetric unit view of complex Rh-3

**Table S1. Sample and crystal data for A VM 018.**

|                               |                                         |                     |
|-------------------------------|-----------------------------------------|---------------------|
| <b>Identification code</b>    | A_VM_018                                |                     |
| <b>Chemical formula</b>       | $C_{64}H_{90}Cl_2P_2Rh_2Si_4$           |                     |
| <b>Formula weight</b>         | 1310.37 g/mol                           |                     |
| <b>Temperature</b>            | 100(2) K                                |                     |
| <b>Wavelength</b>             | 0.71073 Å                               |                     |
| <b>Crystal size</b>           | (0.110 x 0.176 x 0.234) mm <sup>3</sup> |                     |
| <b>Crystal system</b>         | orthorhombic                            |                     |
| <b>Space group</b>            | P b c a                                 |                     |
| <b>Unit cell dimensions</b>   | a = 19.691(7) Å                         | $\alpha = 90^\circ$ |
|                               | b = 15.587(7) Å                         | $\beta = 90^\circ$  |
|                               | c = 20.196(9) Å                         | $\gamma = 90^\circ$ |
| <b>Volume</b>                 | 6199.(4) Å <sup>3</sup>                 |                     |
| <b>Z</b>                      | 4                                       |                     |
| <b>Density (calculated)</b>   | 1.404 g/cm <sup>3</sup>                 |                     |
| <b>Absorption coefficient</b> | 0.787 mm <sup>-1</sup>                  |                     |
| <b>F(000)</b>                 | 2736                                    |                     |

**Table S2. Data collection and structure refinement for A VM 018.**

|                                   |                                                                                          |              |              |
|-----------------------------------|------------------------------------------------------------------------------------------|--------------|--------------|
| Theta range for data collection   | 2.27 to 32.03°                                                                           |              |              |
| Index ranges                      | -28<=h<=29, -23<=k<=23, -30<=l<=30                                                       |              |              |
| Reflections collected             | 99234                                                                                    |              |              |
| Independent reflections           | 10715 [R(int) = 0.0418]                                                                  |              |              |
| Coverage of independent           | 99.4%                                                                                    |              |              |
| Absorption correction             | Multi-Scan                                                                               |              |              |
| Max. and min. transmission        | 0.9180 and 0.8370                                                                        |              |              |
| Structure solution technique      | direct methods                                                                           |              |              |
| Structure solution program        | XT, VERSION 2014/5                                                                       |              |              |
| Refinement method                 | Full-matrix least-squares on F <sup>2</sup>                                              |              |              |
| Refinement program                | SHELXL-2018/3 (Sheldrick, 2018)                                                          |              |              |
| Function minimized                | $\Sigma w(F_o^2 - F_c^2)^2$                                                              |              |              |
| Data / restraints / parameters    | 10715 / 0 / 341                                                                          |              |              |
| Goodness-of-fit on F <sup>2</sup> | 1.062                                                                                    |              |              |
| $\Delta/\sigma_{\max}$            | 0.002                                                                                    |              |              |
| Final R indices                   | 8971 data; l>2 $\sigma$ (l)                                                              | R1 = 0.0316, | wR2 = 0.0810 |
|                                   | all data                                                                                 | R1 = 0.0426, | wR2 = 0.0894 |
| Weighting scheme                  | w=1/[\sigma <sup>2</sup> (F <sub>o</sub> <sup>2</sup> )+(0.0400P) <sup>2</sup> +6.5530P] |              |              |
| Largest diff. peak and hole       | 1.004 and -0.595 eÅ <sup>-3</sup>                                                        |              |              |
| R.M.S. deviation from mean        | 0.118 eÅ <sup>-3</sup>                                                                   |              |              |

**Table S3. Atomic coordinates and equivalent isotropic atomic displacement parameters (Å<sup>2</sup>) for A VM 018.**

*U*(eq) is defined as one third of the trace of the orthogonalized *U*<sub>ij</sub> tensor.

|     | x/a         | y/b         | z/c         | U(eq)      |
|-----|-------------|-------------|-------------|------------|
| Rh1 | 0.45055(2)  | 0.41638(2)  | 0.04764(2)  | 0.01719(4) |
| Cl1 | 0.44800(2)  | 0.48012(3)  | 0.93831(2)  | 0.02300(8) |
| P1  | 0.44817(2)  | 0.37515(3)  | 0.15226(2)  | 0.01856(8) |
| Si1 | 0.50732(2)  | 0.28928(3)  | 0.02879(2)  | 0.02126(9) |
| Si2 | 0.34188(2)  | 0.36394(3)  | 0.03117(2)  | 0.02173(9) |
| C1  | 0.58732(9)  | 0.30342(12) | 0.08089(9)  | 0.0264(3)  |
| C2  | 0.58850(9)  | 0.33206(11) | 0.15225(9)  | 0.0235(3)  |
| C3  | 0.65177(10) | 0.32641(13) | 0.18435(10) | 0.0298(4)  |
| C4  | 0.66153(11) | 0.35543(14) | 0.24836(11) | 0.0352(4)  |

|     | <b>x/a</b>  | <b>y/b</b>  | <b>z/c</b>  | <b>U(eq)</b> |
|-----|-------------|-------------|-------------|--------------|
| C5  | 0.60768(11) | 0.39087(13) | 0.28294(10) | 0.0332(4)    |
| C6  | 0.54410(10) | 0.39592(12) | 0.25301(9)  | 0.0268(3)    |
| C7  | 0.53352(9)  | 0.36667(11) | 0.18831(8)  | 0.0218(3)    |
| C8  | 0.40537(9)  | 0.27585(11) | 0.17634(8)  | 0.0226(3)    |
| C9  | 0.43817(10) | 0.21538(12) | 0.21649(9)  | 0.0265(3)    |
| C10 | 0.40592(11) | 0.13917(13) | 0.23465(9)  | 0.0315(4)    |
| C11 | 0.34066(11) | 0.12323(13) | 0.21257(10) | 0.0321(4)    |
| C12 | 0.30740(10) | 0.18270(12) | 0.17280(9)  | 0.0280(3)    |
| C13 | 0.33853(9)  | 0.25980(12) | 0.15358(8)  | 0.0240(3)    |
| C14 | 0.30074(9)  | 0.32292(12) | 0.11117(9)  | 0.0257(3)    |
| C15 | 0.46938(11) | 0.17857(12) | 0.04377(9)  | 0.0283(4)    |
| C16 | 0.51724(13) | 0.11500(14) | 0.07857(12) | 0.0385(5)    |
| C17 | 0.48305(18) | 0.02811(16) | 0.09017(15) | 0.0555(7)    |
| C18 | 0.54311(10) | 0.29043(13) | 0.94067(9)  | 0.0282(4)    |
| C19 | 0.49370(11) | 0.27037(14) | 0.88502(10) | 0.0345(4)    |
| C20 | 0.60428(12) | 0.22884(16) | 0.93423(12) | 0.0411(5)    |
| C21 | 0.33160(10) | 0.28218(13) | 0.96069(9)  | 0.0289(4)    |
| C22 | 0.28627(12) | 0.20628(14) | 0.97688(11) | 0.0372(4)    |
| C23 | 0.31030(12) | 0.32268(15) | 0.89469(10) | 0.0375(5)    |
| C24 | 0.28953(9)  | 0.46452(12) | 0.01267(10) | 0.0296(4)    |
| C25 | 0.21220(11) | 0.44923(15) | 0.01420(13) | 0.0412(5)    |
| C26 | 0.30864(12) | 0.53710(14) | 0.06035(12) | 0.0374(4)    |
| C27 | 0.40620(9)  | 0.45567(12) | 0.20498(8)  | 0.0236(3)    |
| C28 | 0.42165(10) | 0.54257(12) | 0.19531(9)  | 0.0267(3)    |
| C29 | 0.38971(11) | 0.60564(13) | 0.23302(10) | 0.0324(4)    |
| C30 | 0.34247(12) | 0.58237(15) | 0.28097(12) | 0.0405(5)    |
| C31 | 0.32738(13) | 0.49671(16) | 0.29157(12) | 0.0438(5)    |
| C32 | 0.35907(11) | 0.43316(14) | 0.25358(10) | 0.0342(4)    |



**Table S4. Bond lengths (Å) for A VM 018.**

|           |            |          |            |
|-----------|------------|----------|------------|
| Rh1-P1    | 2.2088(10) | Rh1-Si1  | 2.3064(9)  |
| Rh1-Si2   | 2.3147(9)  | Rh1-Cl1  | 2.4217(10) |
| Rh1-Cl1#1 | 2.5832(8)  | P1-C8    | 1.8282(18) |
| P1-C7     | 1.8364(18) | P1-C27   | 1.8416(18) |
| Si1-C15   | 1.905(2)   | Si1-C1   | 1.9071(19) |
| Si1-C18   | 1.914(2)   | Si2-C24  | 1.913(2)   |
| Si2-C14   | 1.9172(19) | Si2-C21  | 1.921(2)   |
| C1-C2     | 1.509(3)   | C1-H1A1  | 0.99       |
| C1-H1A2   | 0.99       | C2-C3    | 1.407(2)   |
| C2-C7     | 1.412(3)   | C3-C4    | 1.383(3)   |
| C3-H3A    | 0.95       | C4-C5    | 1.385(3)   |
| C4-H4A    | 0.95       | C5-C6    | 1.392(3)   |
| C5-H5A    | 0.95       | C6-C7    | 1.400(2)   |
| C6-H6A    | 0.95       | C8-C9    | 1.401(2)   |
| C8-C13    | 1.416(2)   | C9-C10   | 1.396(3)   |
| C9-H9A    | 0.95       | C10-C11  | 1.383(3)   |
| C10-H10A  | 0.95       | C11-C12  | 1.390(3)   |
| C11-H11A  | 0.95       | C12-C13  | 1.404(3)   |
| C12-H12A  | 0.95       | C13-C14  | 1.502(3)   |
| C14-H14A  | 0.99       | C14-H14B | 0.99       |
| C15-C16   | 1.538(3)   | C15-H15A | 0.99       |
| C15-H15B  | 0.99       | C16-C17  | 1.531(3)   |
| C16-H16A  | 0.99       | C16-H16B | 0.99       |
| C17-H17A  | 0.98       | C17-H17B | 0.98       |
| C17-H17C  | 0.98       | C18-C19  | 1.519(3)   |
| C18-C20   | 1.546(3)   | C18-H18A | 1.0        |
| C19-H19A  | 0.98       | C19-H19B | 0.98       |
| C19-H19C  | 0.98       | C20-H20A | 0.98       |
| C20-H20B  | 0.98       | C20-H20C | 0.98       |
| C21-C22   | 1.518(3)   | C21-C23  | 1.533(3)   |
| C21-H21A  | 1.0        | C22-H22A | 0.98       |
| C22-H22B  | 0.98       | C22-H22C | 0.98       |
| C23-H23A  | 0.98       | C23-H23B | 0.98       |
| C23-H23C  | 0.98       | C24-C26  | 1.533(3)   |
| C24-C25   | 1.542(3)   | C24-H24A | 1.0        |

|          |          |          |          |
|----------|----------|----------|----------|
| C25-H25A | 0.98     | C25-H25B | 0.98     |
| C25-H25C | 0.98     | C26-H26A | 0.98     |
| C26-H26B | 0.98     | C26-H26C | 0.98     |
| C27-C32  | 1.396(3) | C27-C28  | 1.402(3) |
| C28-C29  | 1.394(3) | C28-H28A | 0.95     |
| C29-C30  | 1.391(3) | C29-H29A | 0.95     |
| C30-C31  | 1.385(3) | C30-H30A | 0.95     |
| C31-C32  | 1.400(3) | C31-H31A | 0.95     |
| C32-H32A | 0.95     |          |          |

**Symmetry transformations used to generate equivalent atoms:**

#1  $-x+1, -y+1, -z$

Table S5. Bond angles (°) for A VM 018.

|               |             |               |             |
|---------------|-------------|---------------|-------------|
| P1-Rh1-Si1    | 85.31(2)    | P1-Rh1-Si2    | 90.864(18)  |
| Si1-Rh1-Si2   | 96.95(3)    | P1-Rh1-Cl1    | 172.308(17) |
| Si1-Rh1-Cl1   | 102.23(2)   | Si2-Rh1-Cl1   | 89.696(19)  |
| P1-Rh1-Cl1#1  | 95.343(19)  | Si1-Rh1-Cl1#1 | 100.36(3)   |
| Si2-Rh1-Cl1#1 | 162.021(18) | Cl1-Rh1-Cl1#1 | 81.95(2)    |
| Rh1-Cl1-Rh1#1 | 98.05(2)    | C8-P1-C7      | 104.80(8)   |
| C8-P1-C27     | 102.49(8)   | C7-P1-C27     | 103.33(8)   |
| C8-P1-Rh1     | 120.70(6)   | C7-P1-Rh1     | 112.38(6)   |
| C27-P1-Rh1    | 111.36(6)   | C15-Si1-C1    | 109.95(9)   |
| C15-Si1-C18   | 107.50(9)   | C1-Si1-C18    | 101.99(9)   |
| C15-Si1-Rh1   | 124.19(7)   | C1-Si1-Rh1    | 102.12(6)   |
| C18-Si1-Rh1   | 108.90(7)   | C24-Si2-C14   | 102.14(9)   |
| C24-Si2-C21   | 110.00(9)   | C14-Si2-C21   | 111.02(9)   |
| C24-Si2-Rh1   | 103.70(7)   | C14-Si2-Rh1   | 112.79(6)   |
| C21-Si2-Rh1   | 115.98(7)   | C2-C1-Si1     | 125.02(13)  |
| C2-C1-H1A1    | 106.1       | Si1-C1-H1A1   | 106.1       |
| C2-C1-H1A2    | 106.1       | Si1-C1-H1A2   | 106.1       |
| H1A1-C1-H1A2  | 106.3       | C3-C2-C7      | 117.71(16)  |
| C3-C2-C1      | 115.80(16)  | C7-C2-C1      | 126.43(15)  |
| C4-C3-C2      | 122.23(19)  | C4-C3-H3A     | 118.9       |
| C2-C3-H3A     | 118.9       | C3-C4-C5      | 119.70(18)  |
| C3-C4-H4A     | 120.1       | C5-C4-H4A     | 120.1       |
| C4-C5-C6      | 119.48(18)  | C4-C5-H5A     | 120.3       |

|               |            |               |            |
|---------------|------------|---------------|------------|
| C6-C5-H5A     | 120.3      | C5-C6-C7      | 121.39(18) |
| C5-C6-H6A     | 119.3      | C7-C6-H6A     | 119.3      |
| C6-C7-C2      | 119.47(16) | C6-C7-P1      | 118.88(14) |
| C2-C7-P1      | 121.65(13) | C9-C8-C13     | 119.82(16) |
| C9-C8-P1      | 120.73(14) | C13-C8-P1     | 119.45(13) |
| C10-C9-C8     | 120.98(18) | C10-C9-H9A    | 119.5      |
| C8-C9-H9A     | 119.5      | C11-C10-C9    | 119.41(18) |
| C11-C10-H10A  | 120.3      | C9-C10-H10A   | 120.3      |
| C10-C11-C12   | 120.28(17) | C10-C11-H11A  | 119.9      |
| C12-C11-H11A  | 119.9      | C11-C12-C13   | 121.65(18) |
| C11-C12-H12A  | 119.2      | C13-C12-H12A  | 119.2      |
| C12-C13-C8    | 117.86(16) | C12-C13-C14   | 120.14(16) |
| C8-C13-C14    | 121.99(15) | C13-C14-Si2   | 119.32(13) |
| C13-C14-H14A  | 107.5      | Si2-C14-H14A  | 107.5      |
| C13-C14-H14B  | 107.5      | Si2-C14-H14B  | 107.5      |
| H14A-C14-H14B | 107.0      | C16-C15-Si1   | 114.58(15) |
| C16-C15-H15A  | 108.6      | Si1-C15-H15A  | 108.6      |
| C16-C15-H15B  | 108.6      | Si1-C15-H15B  | 108.6      |
| H15A-C15-H15B | 107.6      | C17-C16-C15   | 111.7(2)   |
| C17-C16-H16A  | 109.3      | C15-C16-H16A  | 109.3      |
| C17-C16-H16B  | 109.3      | C15-C16-H16B  | 109.3      |
| H16A-C16-H16B | 107.9      | C16-C17-H17A  | 109.5      |
| C16-C17-H17B  | 109.5      | H17A-C17-H17B | 109.5      |
| C16-C17-H17C  | 109.5      | H17A-C17-H17C | 109.5      |
| H17B-C17-H17C | 109.5      | C19-C18-C20   | 107.99(17) |
| C19-C18-Si1   | 116.75(14) | C20-C18-Si1   | 111.06(14) |
| C19-C18-H18A  | 106.8      | C20-C18-H18A  | 106.8      |
| Si1-C18-H18A  | 106.8      | C18-C19-H19A  | 109.5      |
| C18-C19-H19B  | 109.5      | H19A-C19-H19B | 109.5      |
| C18-C19-H19C  | 109.5      | H19A-C19-H19C | 109.5      |
| H19B-C19-H19C | 109.5      | C18-C20-H20A  | 109.5      |
| C18-C20-H20B  | 109.5      | H20A-C20-H20B | 109.5      |
| C18-C20-H20C  | 109.5      | H20A-C20-H20C | 109.5      |
| H20B-C20-H20C | 109.5      | C22-C21-C23   | 110.33(16) |
| C22-C21-Si2   | 114.79(14) | C23-C21-Si2   | 113.56(15) |
| C22-C21-H21A  | 105.8      | C23-C21-H21A  | 105.8      |
| Si2-C21-H21A  | 105.8      | C21-C22-H22A  | 109.5      |

|               |            |               |            |
|---------------|------------|---------------|------------|
| C21-C22-H22B  | 109.5      | H22A-C22-H22B | 109.5      |
| C21-C22-H22C  | 109.5      | H22A-C22-H22C | 109.5      |
| H22B-C22-H22C | 109.5      | C21-C23-H23A  | 109.5      |
| C21-C23-H23B  | 109.5      | H23A-C23-H23B | 109.5      |
| C21-C23-H23C  | 109.5      | H23A-C23-H23C | 109.5      |
| H23B-C23-H23C | 109.5      | C26-C24-C25   | 110.13(19) |
| C26-C24-Si2   | 110.47(14) | C25-C24-Si2   | 113.68(14) |
| C26-C24-H24A  | 107.4      | C25-C24-H24A  | 107.4      |
| Si2-C24-H24A  | 107.4      | C24-C25-H25A  | 109.5      |
| C24-C25-H25B  | 109.5      | H25A-C25-H25B | 109.5      |
| C24-C25-H25C  | 109.5      | H25A-C25-H25C | 109.5      |
| H25B-C25-H25C | 109.5      | C24-C26-H26A  | 109.5      |
| C24-C26-H26B  | 109.5      | H26A-C26-H26B | 109.5      |
| C24-C26-H26C  | 109.5      | H26A-C26-H26C | 109.5      |
| H26B-C26-H26C | 109.5      | C32-C27-C28   | 119.02(17) |
| C32-C27-P1    | 122.25(15) | C28-C27-P1    | 118.72(13) |
| C29-C28-C27   | 120.50(18) | C29-C28-H28A  | 119.7      |
| C27-C28-H28A  | 119.7      | C30-C29-C28   | 119.9(2)   |
| C30-C29-H29A  | 120.1      | C28-C29-H29A  | 120.1      |
| C31-C30-C29   | 120.17(19) | C31-C30-H30A  | 119.9      |
| C29-C30-H30A  | 119.9      | C30-C31-C32   | 120.1(2)   |
| C30-C31-H31A  | 119.9      | C32-C31-H31A  | 119.9      |
| C27-C32-C31   | 120.3(2)   | C27-C32-H32A  | 119.9      |
| C31-C32-H32A  | 119.9      |               |            |

***Symmetry transformations used to generate equivalent atoms:***

**#1  $-x+1, -y+1, -z$**

## 3.2 X-ray diffraction data of complex **Rh-4** (CCDC 2133161)

### Crystal Structure Report for A\_VM\_005\_bi

A yellow light crystal prism like  $C_{32}H_{40}ClOPRhSi_2$ , approximate dimensions (0.107 x 0.173 x 0.303) mm<sup>3</sup>, was selected for the X-ray crystallographic analysis and mounted on a cryoloop using an oil cryoprotectant. The X-ray intensity data was measured at low temperature (T = 100K), using a three circles goniometer Kappa geometry with a fixed Kappa angle at = 54.74 deg Bruker AXS D8 Venture, equipped with a Photon 100 CMOS active pixel sensor detector. A monochromatized Copper X-ray radiation was used. Frames were integrated with the Bruker SAINT software using a narrow-frame algorithm.<sup>12,13</sup> The integration of the data using a triclinic unit cell yielded a total of 24271 reflections to a maximum  $\theta$  angle of 72.57° (0.81 Å resolution), of which 24271 were independent (average redundancy 1.000, completeness = 98.0%,  $R_{sig} = 7.31\%$ ) and 21580 (88.91%) were greater than  $2\sigma$  ( $F^2$ ). The final cell constants of  $a = 9.844(5)$  Å,  $b = 11.815(7)$  Å,  $c = 13.809(8)$  Å,  $\alpha = 102.799(15)^\circ$ ,  $\beta = 95.00(2)^\circ$ ,  $\gamma = 97.929(16)^\circ$ , volume = 1539.6(15) Å<sup>3</sup>, are based upon the refinement of the XYZ-centroids of 1331 reflections above  $20\sigma$  (I) with  $6.613^\circ < 2\theta < 51.84^\circ$ . Data were corrected for absorption effects using the multi-Scan method (SADABS). The calculated minimum and maximum transmission coefficients (based on crystal size) are 0.2360 and 0.5340. The structure was solved in a triclinic unit cell using the Bruker SHELXT Software Package,<sup>14</sup> using the centrosymmetric space group P -1, with Z = 2 for the formula unit,  $C_{32}H_{40}ClOPRhSi_2$ . Refinement of the structure was carried out by least squares procedures on weighted  $F^2$  values using the SHELXTL-2018/3<sup>15</sup> included in the APEX3 v2018, 7.0, AXS Bruker program.<sup>16</sup> Hydrogen atoms were localized on difference Fourier maps but then introduced in the refinement as fixed contributors in idealized geometry with an isotropic thermal parameter fixed at 20 % higher than those carbons atoms they were connected. A molecule of solvent: Benzene was found crystallized with the complex. Some iPr groups were found to be statistically disordered and were anisotropically refined with a ratio of occupancy equal to 52/4%. Restraints were added on interatomic lengths and angles. Finally, a non-merohedral twinning was depicted using the software Cell\_now integrated in APEX3 v2018, 7.0. The final anisotropic full-matrix

least-squares refinement on  $F^2$  with 409 variables converged at  $R1 = 4.30\%$ , for the observed data and  $wR2 = 11.29\%$  for all data. The goodness-of-fit: GOF was 1.027. The largest peak in the final difference electron density synthesis was  $0.880 \text{ e}^-/\text{\AA}^3$  and the largest whole was  $-1.154 \text{ e}^-/\text{\AA}^3$  with an RMS deviation of  $0.095 \text{ e}^-/\text{\AA}^3$ . On the basis of the final model, the calculated density was  $1.437 \text{ g/cm}^3$  and  $F(000)$ ,  $690 \text{ e}^-$ . Cif file was formatted using CIF format: Hall, S. R.; McMahon, B. International Tables for Crystallography Volume G: Definition and exchange of crystallographic data. Dordrecht: Springer 2005.

***Crystal's views:***

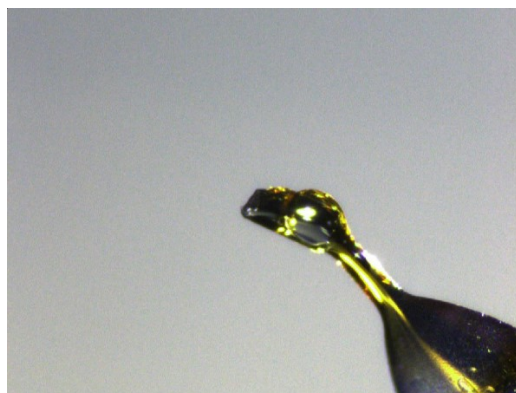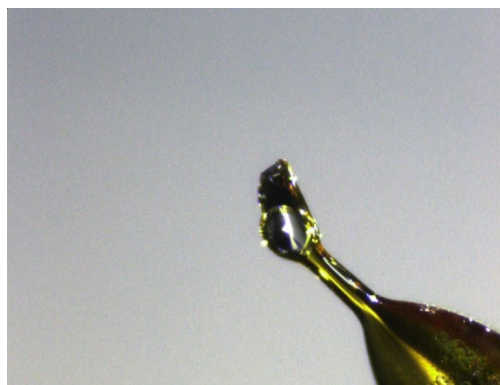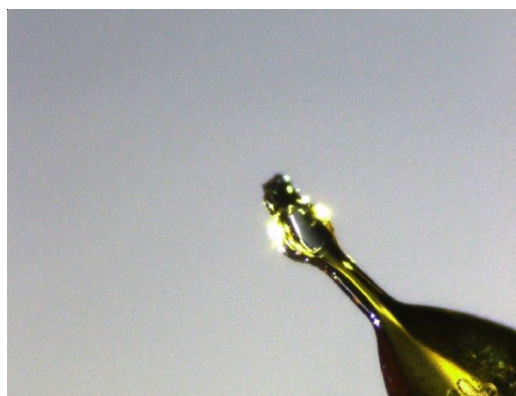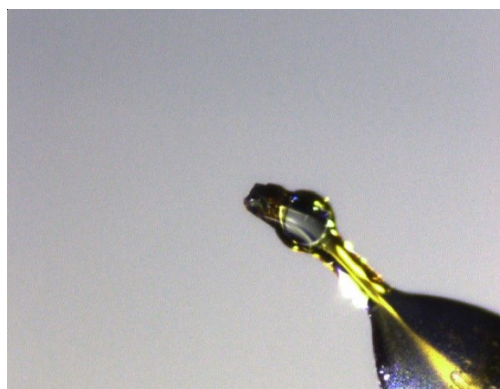

**Twin Peaks:**

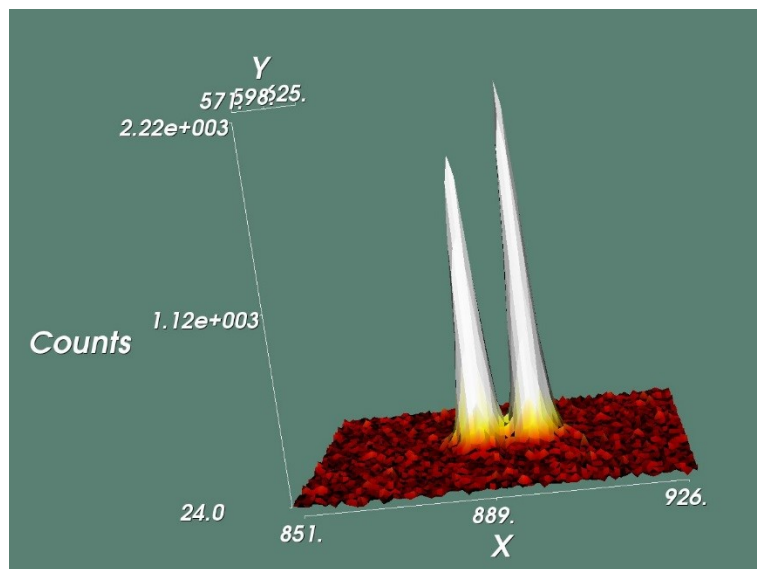

**Asymmetric unit's view:**

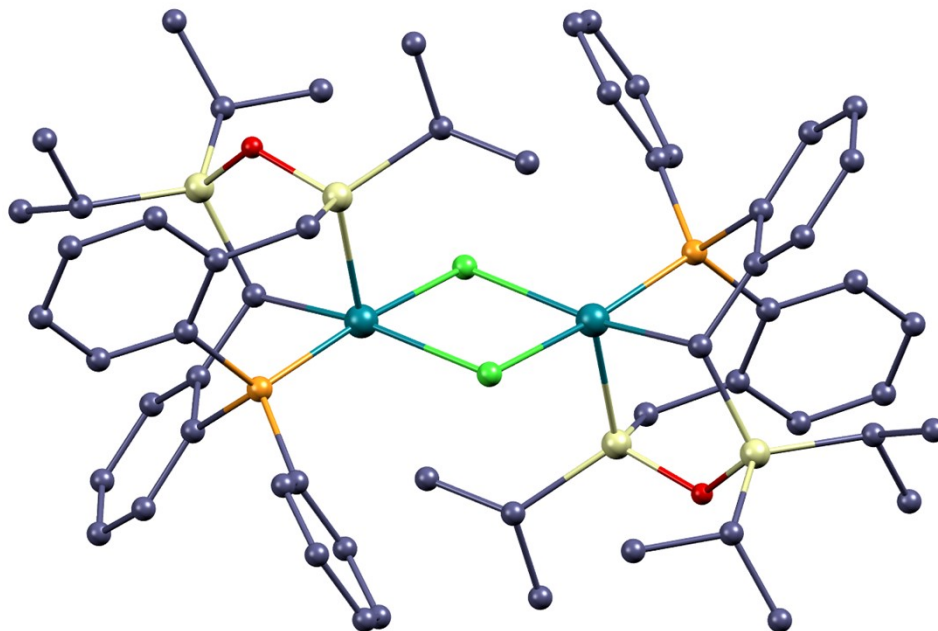

**Figure S7.** Asymmetric unit view of complex Rh-4

**Table S6. Sample and crystal data for Cu\_A\_VM\_005\_bi.**

|                               |                                                       |                  |
|-------------------------------|-------------------------------------------------------|------------------|
| <b>Identification code</b>    | Cu_A_VM_005_bi                                        |                  |
| <b>Chemical formula</b>       | C <sub>32</sub> H <sub>40</sub> ClOPRhSi <sub>2</sub> |                  |
| <b>Formula weight</b>         | 666.15 g/mol                                          |                  |
| <b>Temperature</b>            | 100(2) K                                              |                  |
| <b>Wavelength</b>             | 1.54178 Å                                             |                  |
| <b>Crystal size</b>           | (0.107 x 0.173 x 0.303) mm <sup>3</sup>               |                  |
| <b>Crystal system</b>         | triclinic                                             |                  |
| <b>Space group</b>            | P -1                                                  |                  |
| <b>Unit cell dimensions</b>   | a = 9.844(5) Å                                        | α = 102.799(15)° |
|                               | b = 11.815(7) Å                                       | β = 95.00(2)°    |
|                               | c = 13.809(8) Å                                       | γ = 97.929(16)°  |
| <b>Volume</b>                 | 1539.6(15) Å <sup>3</sup>                             |                  |
| <b>Z</b>                      | 2                                                     |                  |
| <b>Density (calculated)</b>   | 1.437 g/cm <sup>3</sup>                               |                  |
| <b>Absorption coefficient</b> | 6.699 mm <sup>-1</sup>                                |                  |
| <b>F(000)</b>                 | 690                                                   |                  |



**Table S7. Data collection and structure refinement for Cu A VM 005 bi.**

|                                            |                                                                                                                         |                           |
|--------------------------------------------|-------------------------------------------------------------------------------------------------------------------------|---------------------------|
| <b>Theta range for data collection</b>     | 3.31 to 72.57°                                                                                                          |                           |
| <b>Index ranges</b>                        | -12<=h<=12, -14<=k<=14, -17<=l<=17                                                                                      |                           |
| <b>Reflections collected</b>               | 24271                                                                                                                   |                           |
| <b>Coverage of independent reflections</b> | 98.0%                                                                                                                   |                           |
| <b>Max. and min. transmission</b>          | 0.5340 and 0.2360                                                                                                       |                           |
| <b>Structure solution technique</b>        | direct methods                                                                                                          |                           |
| <b>Structure solution program</b>          | XT, VERSION 2014/5                                                                                                      |                           |
| <b>Refinement method</b>                   | Full-matrix least-squares on F <sup>2</sup>                                                                             |                           |
| <b>Refinement program</b>                  | SHELXL-2018/3 (Sheldrick, 2018)                                                                                         |                           |
| <b>Function minimized</b>                  | $\Sigma w(F_o^2 - F_c^2)^2$                                                                                             |                           |
| <b>Data / restraints / parameters</b>      | 24271 / 180 / 409                                                                                                       |                           |
| <b>Goodness-of-fit on F<sup>2</sup></b>    | 1.027                                                                                                                   |                           |
| <b><math>\Delta/\sigma_{\max}</math></b>   | 0.001                                                                                                                   |                           |
| <b>Final R indices</b>                     | 21580 data;<br>I>2 $\sigma$ (I)                                                                                         | R1 = 0.0430, wR2 = 0.1067 |
|                                            | all data                                                                                                                | R1 = 0.0519, wR2 = 0.1129 |
| <b>Weighting scheme</b>                    | w=1/[ $\sigma^2(F_o^2)+(0.0413P)^2+1.6201P$ ]<br>where P=(F <sub>o</sub> <sup>2</sup> +2F <sub>c</sub> <sup>2</sup> )/3 |                           |
| <b>Largest diff. peak and hole</b>         | 0.880 and -1.154 eÅ <sup>-3</sup>                                                                                       |                           |
| <b>R.M.S. deviation from mean</b>          | 0.095 eÅ <sup>-3</sup>                                                                                                  |                           |

**Table S8. Atomic coordinates and equivalent isotropic atomic displacement parameters ( $\text{\AA}^2$ ) for Cu A VM 005 bi.**

*U(eq)* is defined as one third of the trace of the orthogonalized  $U_{ij}$  tensor.

|      | x/a         | y/b         | z/c         | U(eq)       |
|------|-------------|-------------|-------------|-------------|
| Rh1  | 0.57889(3)  | 0.43011(3)  | 0.89749(3)  | 0.02882(12) |
| Cl1  | 0.63931(12) | 0.60381(12) | 0.03314(11) | 0.0551(4)   |
| P1   | 0.55558(10) | 0.25819(9)  | 0.78926(8)  | 0.0212(2)   |
| Si1  | 0.50046(12) | 0.51019(11) | 0.77302(11) | 0.0373(3)   |
| Si2  | 0.79106(12) | 0.51775(10) | 0.74749(9)  | 0.0258(3)   |
| O1   | 0.6338(3)   | 0.5432(3)   | 0.7142(3)   | 0.0346(8)   |
| C2   | 0.7815(4)   | 0.4467(4)   | 0.8579(3)   | 0.0220(9)   |
| C3   | 0.8259(4)   | 0.3280(4)   | 0.8477(3)   | 0.0223(9)   |
| C4   | 0.9636(4)   | 0.3139(4)   | 0.8728(3)   | 0.0264(9)   |
| C5   | 0.9993(5)   | 0.2034(4)   | 0.8636(3)   | 0.0310(10)  |
| C6   | 0.9001(5)   | 0.1029(4)   | 0.8315(4)   | 0.0344(11)  |
| C7   | 0.7644(5)   | 0.1133(4)   | 0.8058(3)   | 0.0297(10)  |
| C8   | 0.7275(4)   | 0.2249(4)   | 0.8137(3)   | 0.0235(9)   |
| C9   | 0.4322(4)   | 0.1400(4)   | 0.8120(3)   | 0.0255(9)   |
| C10  | 0.4413(5)   | 0.1149(5)   | 0.9060(4)   | 0.0402(12)  |
| C11  | 0.3428(6)   | 0.0310(6)   | 0.9270(5)   | 0.0478(14)  |
| C12  | 0.2354(5)   | 0.9713(5)   | 0.8551(4)   | 0.0400(12)  |
| C13  | 0.2249(5)   | 0.9950(4)   | 0.7620(4)   | 0.0358(11)  |
| C14  | 0.3227(5)   | 0.0799(4)   | 0.7405(4)   | 0.0296(10)  |
| C15  | 0.5206(4)   | 0.2405(4)   | 0.6545(3)   | 0.0238(9)   |
| C16  | 0.5832(5)   | 0.1595(4)   | 0.5907(3)   | 0.0298(10)  |
| C17  | 0.5575(6)   | 0.1439(5)   | 0.4874(4)   | 0.0431(13)  |
| C18  | 0.4710(7)   | 0.2088(6)   | 0.4486(4)   | 0.0527(16)  |
| C19  | 0.4108(6)   | 0.2904(5)   | 0.5101(4)   | 0.0440(13)  |
| C20  | 0.4320(5)   | 0.3081(4)   | 0.6151(4)   | 0.0316(10)  |
| C21  | 0.3672(5)   | 0.3975(4)   | 0.6807(4)   | 0.0395(12)  |
| C22A | 0.4265(11)  | 0.6453(10)  | 0.8327(8)   | 0.031(2)    |
| C23A | 0.3011(11)  | 0.6322(10)  | 0.8899(8)   | 0.026(2)    |
| C24A | 0.3866(15)  | 0.6953(12)  | 0.7415(8)   | 0.057(3)    |
| C25A | 0.896(2)    | 0.6673(16)  | 0.7960(12)  | 0.029(3)    |
| C26A | 0.8341(14)  | 0.7471(11)  | 0.8780(9)   | 0.034(2)    |
| C27A | 0.915(4)    | 0.726(3)    | 0.7077(14)  | 0.035(4)    |

|      | <b>x/a</b> | <b>y/b</b> | <b>z/c</b> | <b>U(eq)</b> |
|------|------------|------------|------------|--------------|
| C22B | 0.4244(11) | 0.6547(9)  | 0.7879(9)  | 0.029(2)     |
| C24B | 0.5286(10) | 0.7684(7)  | 0.8266(7)  | 0.031(2)     |
| C23B | 0.3061(11) | 0.6530(11) | 0.8541(11) | 0.030(3)     |
| C25B | 0.918(2)   | 0.6641(17) | 0.7730(12) | 0.026(3)     |
| C26B | 0.9015(15) | 0.7418(11) | 0.8745(9)  | 0.033(3)     |
| C27B | 0.903(4)   | 0.733(3)   | 0.6906(14) | 0.036(4)     |
| C28  | 0.8462(4)  | 0.4162(4)  | 0.6375(3)  | 0.0287(9)    |
| C29  | 0.7912(5)  | 0.4336(5)  | 0.5354(3)  | 0.0401(11)   |
| C30  | 0.0045(4)  | 0.4234(5)  | 0.6469(4)  | 0.0354(10)   |
| C1S  | 0.0377(6)  | 0.9118(5)  | 0.4295(4)  | 0.0457(13)   |
| C2S  | 0.1150(6)  | 0.0235(5)  | 0.4533(4)  | 0.0418(12)   |
| C3S  | 0.0776(5)  | 0.1114(5)  | 0.5241(4)  | 0.0377(11)   |

**Table S9. Bond lengths (Å) for Cu A VM 005 bi.**

|          |            |          |            |
|----------|------------|----------|------------|
| Rh1-C2   | 2.108(4)   | Rh1-P1   | 2.2087(14) |
| Rh1-Si1  | 2.2663(18) | Rh1-Cl1  | 2.4167(15) |
| Rh1-Cl1  | 2.4460(16) | P1-C8    | 1.810(4)   |
| P1-C9    | 1.821(5)   | P1-C15   | 1.823(5)   |
| Si1-O1   | 1.649(4)   | Si1-C21  | 1.895(5)   |
| Si1-C22A | 1.897(11)  | Si1-C22B | 1.934(12)  |
| Si2-O1   | 1.663(3)   | Si2-C25A | 1.87(2)    |
| Si2-C28  | 1.886(5)   | Si2-C2   | 1.900(5)   |
| Si2-C25B | 1.93(2)    | C2-C3    | 1.507(6)   |
| C2-H2    | 1.0        | C3-C8    | 1.408(6)   |
| C3-C4    | 1.411(6)   | C4-C5    | 1.380(7)   |
| C4-H4    | 0.95       | C5-C6    | 1.390(7)   |
| C5-H5    | 0.95       | C6-C7    | 1.381(7)   |
| C6-H6    | 0.95       | C7-C8    | 1.399(7)   |
| C7-H7    | 0.95       | C9-C14   | 1.391(6)   |
| C9-C10   | 1.393(7)   | C10-C11  | 1.384(8)   |
| C10-H10  | 0.95       | C11-C12  | 1.379(9)   |
| C11-H11  | 0.95       | C12-C13  | 1.374(8)   |
| C12-H12  | 0.95       | C13-C14  | 1.391(7)   |
| C13-H13  | 0.95       | C14-H14  | 0.95       |
| C15-C16  | 1.398(6)   | C15-C20  | 1.413(7)   |

|           |          |           |          |
|-----------|----------|-----------|----------|
| C16-C17   | 1.393(7) | C16-H16   | 0.95     |
| C17-C18   | 1.372(9) | C17-H17   | 0.95     |
| C18-C19   | 1.373(9) | C18-H18   | 0.95     |
| C19-C20   | 1.410(7) | C19-H19   | 0.95     |
| C20-C21   | 1.486(7) | C21-H21A  | 0.99     |
| C21-H21B  | 0.99     | C22A-C23A | 1.531(9) |
| C22A-C24A | 1.548(9) | C22A-H22A | 1.0      |
| C23A-H23A | 0.98     | C23A-H23B | 0.98     |
| C23A-H23C | 0.98     | C24A-H24A | 0.98     |
| C24A-H24B | 0.98     | C24A-H24C | 0.98     |
| C25A-C26A | 1.533(9) | C25A-C27A | 1.546(9) |
| C25A-H25A | 1.0      | C26A-H26A | 0.98     |
| C26A-H26B | 0.98     | C26A-H26C | 0.98     |
| C27A-H27A | 0.98     | C27A-H27B | 0.98     |
| C27A-H27C | 0.98     | C22B-C24B | 1.532(9) |
| C22B-C23B | 1.543(9) | C22B-H22B | 1.0      |
| C24B-H24D | 0.98     | C24B-H24E | 0.98     |
| C24B-H24F | 0.98     | C23B-H23D | 0.98     |
| C23B-H23E | 0.98     | C23B-H23F | 0.98     |
| C25B-C26B | 1.531(9) | C25B-C27B | 1.544(9) |
| C25B-H25B | 1.0      | C26B-H26D | 0.98     |
| C26B-H26E | 0.98     | C26B-H26F | 0.98     |
| C27B-H27D | 0.98     | C27B-H27E | 0.98     |
| C27B-H27F | 0.98     | C28-C29   | 1.532(6) |
| C28-C30   | 1.541(6) | C28-H28   | 1.0      |
| C29-H29A  | 0.98     | C29-H29B  | 0.98     |
| C29-H29C  | 0.98     | C30-H30A  | 0.98     |
| C30-H30B  | 0.98     | C30-H30C  | 0.98     |
| C1S-C3S   | 1.375(8) | C1S-C2S   | 1.384(8) |
| C1S-H1S   | 0.95     | C2S-C3S   | 1.374(7) |
| C2S-H2S   | 0.95     | C3S-H3S   | 0.95     |

**Table S10. Bond angles (°) for Cu A VM 005 bi**

|              |            |              |            |
|--------------|------------|--------------|------------|
| C2-Rh1-P1    | 82.67(11)  | C2-Rh1-Si1   | 92.45(13)  |
| P1-Rh1-Si1   | 89.51(6)   | C2-Rh1-Cl1   | 91.64(11)  |
| P1-Rh1-Cl1   | 168.77(5)  | Si1-Rh1-Cl1  | 100.44(7)  |
| C2-Rh1-Cl1   | 169.88(13) | P1-Rh1-Cl1   | 97.46(5)   |
| Si1-Rh1-Cl1  | 97.68(6)   | Cl1-Rh1-Cl1  | 86.44(5)   |
| Rh1-Cl1-Rh1  | 93.56(5)   | C8-P1-C9     | 108.0(2)   |
| C8-P1-C15    | 106.91(19) | C9-P1-C15    | 102.6(2)   |
| C8-P1-Rh1    | 98.87(14)  | C9-P1-Rh1    | 116.41(14) |
| C15-P1-Rh1   | 123.00(15) | O1-Si1-C21   | 108.1(2)   |
| O1-Si1-C22A  | 112.2(3)   | C21-Si1-C22A | 112.2(4)   |
| O1-Si1-C22B  | 99.7(3)    | C21-Si1-C22B | 104.2(4)   |
| O1-Si1-Rh1   | 106.83(13) | C21-Si1-Rh1  | 109.76(19) |
| C22A-Si1-Rh1 | 107.7(3)   | C22B-Si1-Rh1 | 126.8(4)   |
| O1-Si2-C25A  | 104.5(6)   | O1-Si2-C28   | 108.32(18) |
| C25A-Si2-C28 | 118.1(5)   | O1-Si2-C2    | 107.84(18) |
| C25A-Si2-C2  | 106.7(6)   | C28-Si2-C2   | 110.85(19) |
| O1-Si2-C25B  | 108.3(7)   | C28-Si2-C25B | 106.4(5)   |
| C2-Si2-C25B  | 114.9(6)   | Si1-O1-Si2   | 122.6(2)   |
| C3-C2-Si2    | 118.0(3)   | C3-C2-Rh1    | 107.0(3)   |
| Si2-C2-Rh1   | 110.3(2)   | C3-C2-H2     | 107.0      |
| Si2-C2-H2    | 107.0      | Rh1-C2-H2    | 107.0      |
| C8-C3-C4     | 117.1(4)   | C8-C3-C2     | 119.9(4)   |
| C4-C3-C2     | 122.9(4)   | C5-C4-C3     | 121.0(4)   |
| C5-C4-H4     | 119.5      | C3-C4-H4     | 119.5      |
| C4-C5-C6     | 120.9(4)   | C4-C5-H5     | 119.5      |
| C6-C5-H5     | 119.5      | C7-C6-C5     | 119.7(4)   |
| C7-C6-H6     | 120.2      | C5-C6-H6     | 120.2      |
| C6-C7-C8     | 119.8(4)   | C6-C7-H7     | 120.1      |
| C8-C7-H7     | 120.1      | C7-C8-C3     | 121.5(4)   |
| C7-C8-P1     | 126.8(3)   | C3-C8-P1     | 111.6(3)   |
| C14-C9-C10   | 118.8(4)   | C14-C9-P1    | 121.8(4)   |
| C10-C9-P1    | 119.2(4)   | C11-C10-C9   | 120.1(5)   |
| C11-C10-H10  | 119.9      | C9-C10-H10   | 119.9      |
| C12-C11-C10  | 120.5(5)   | C12-C11-H11  | 119.8      |
| C10-C11-H11  | 119.8      | C13-C12-C11  | 120.2(5)   |
| C13-C12-H12  | 119.9      | C11-C12-H12  | 119.9      |

|                |           |                |           |
|----------------|-----------|----------------|-----------|
| C12-C13-C14    | 119.8(5)  | C12-C13-H13    | 120.1     |
| C14-C13-H13    | 120.1     | C9-C14-C13     | 120.6(5)  |
| C9-C14-H14     | 119.7     | C13-C14-H14    | 119.7     |
| C16-C15-C20    | 120.5(4)  | C16-C15-P1     | 119.0(4)  |
| C20-C15-P1     | 120.5(3)  | C17-C16-C15    | 120.2(5)  |
| C17-C16-H16    | 119.9     | C15-C16-H16    | 119.9     |
| C18-C17-C16    | 119.6(5)  | C18-C17-H17    | 120.2     |
| C16-C17-H17    | 120.2     | C17-C18-C19    | 121.0(5)  |
| C17-C18-H18    | 119.5     | C19-C18-H18    | 119.5     |
| C18-C19-C20    | 121.4(5)  | C18-C19-H19    | 119.3     |
| C20-C19-H19    | 119.3     | C19-C20-C15    | 117.3(5)  |
| C19-C20-C21    | 120.8(5)  | C15-C20-C21    | 121.9(4)  |
| C20-C21-Si1    | 111.9(3)  | C20-C21-H21A   | 109.2     |
| Si1-C21-H21A   | 109.2     | C20-C21-H21B   | 109.2     |
| Si1-C21-H21B   | 109.2     | H21A-C21-H21B  | 107.9     |
| C23A-C22A-C24A | 108.8(7)  | C23A-C22A-Si1  | 119.9(7)  |
| C24A-C22A-Si1  | 102.3(7)  | C23A-C22A-H22A | 108.4     |
| C24A-C22A-H22A | 108.4     | Si1-C22A-H22A  | 108.4     |
| C22A-C23A-H23A | 109.5     | C22A-C23A-H23B | 109.5     |
| H23A-C23A-H23B | 109.5     | C22A-C23A-H23C | 109.5     |
| H23A-C23A-H23C | 109.5     | H23B-C23A-H23C | 109.5     |
| C22A-C24A-H24A | 109.5     | C22A-C24A-H24B | 109.5     |
| H24A-C24A-H24B | 109.5     | C22A-C24A-H24C | 109.5     |
| H24A-C24A-H24C | 109.5     | H24B-C24A-H24C | 109.5     |
| C26A-C25A-C27A | 109.8(8)  | C26A-C25A-Si2  | 113.9(11) |
| C27A-C25A-Si2  | 108.9(16) | C26A-C25A-H25A | 108.0     |
| C27A-C25A-H25A | 108.0     | Si2-C25A-H25A  | 108.0     |
| C25A-C26A-H26A | 109.5     | C25A-C26A-H26B | 109.5     |
| H26A-C26A-H26B | 109.5     | C25A-C26A-H26C | 109.5     |
| H26A-C26A-H26C | 109.5     | H26B-C26A-H26C | 109.5     |
| C25A-C27A-H27A | 109.5     | C25A-C27A-H27B | 109.5     |
| H27A-C27A-H27B | 109.5     | C25A-C27A-H27C | 109.5     |
| H27A-C27A-H27C | 109.5     | H27B-C27A-H27C | 109.5     |
| C24B-C22B-C23B | 110.1(8)  | C24B-C22B-Si1  | 115.7(8)  |
| C23B-C22B-Si1  | 110.3(7)  | C24B-C22B-H22B | 106.8     |
| C23B-C22B-H22B | 106.8     | Si1-C22B-H22B  | 106.8     |
| C22B-C24B-H24D | 109.5     | C22B-C24B-H24E | 109.5     |

|                |           |                |           |
|----------------|-----------|----------------|-----------|
| H24D-C24B-H24E | 109.5     | C22B-C24B-H24F | 109.5     |
| H24D-C24B-H24F | 109.5     | H24E-C24B-H24F | 109.5     |
| C22B-C23B-H23D | 109.5     | C22B-C23B-H23E | 109.5     |
| H23D-C23B-H23E | 109.5     | C22B-C23B-H23F | 109.5     |
| H23D-C23B-H23F | 109.5     | H23E-C23B-H23F | 109.5     |
| C26B-C25B-C27B | 110.0(9)  | C26B-C25B-Si2  | 109.9(11) |
| C27B-C25B-Si2  | 114.0(19) | C26B-C25B-H25B | 107.5     |
| C27B-C25B-H25B | 107.5     | Si2-C25B-H25B  | 107.5     |
| C25B-C26B-H26D | 109.5     | C25B-C26B-H26E | 109.5     |
| H26D-C26B-H26E | 109.5     | C25B-C26B-H26F | 109.5     |
| H26D-C26B-H26F | 109.5     | H26E-C26B-H26F | 109.5     |
| C25B-C27B-H27D | 109.5     | C25B-C27B-H27E | 109.5     |
| H27D-C27B-H27E | 109.5     | C25B-C27B-H27F | 109.5     |
| H27D-C27B-H27F | 109.5     | H27E-C27B-H27F | 109.5     |
| C29-C28-C30    | 110.6(4)  | C29-C28-Si2    | 114.2(3)  |
| C30-C28-Si2    | 111.4(3)  | C29-C28-H28    | 106.7     |
| C30-C28-H28    | 106.7     | Si2-C28-H28    | 106.7     |
| C28-C29-H29A   | 109.5     | C28-C29-H29B   | 109.5     |
| H29A-C29-H29B  | 109.5     | C28-C29-H29C   | 109.5     |
| H29A-C29-H29C  | 109.5     | H29B-C29-H29C  | 109.5     |
| C28-C30-H30A   | 109.5     | C28-C30-H30B   | 109.5     |
| H30A-C30-H30B  | 109.5     | C28-C30-H30C   | 109.5     |
| H30A-C30-H30C  | 109.5     | H30B-C30-H30C  | 109.5     |
| C3S-C1S-C2S    | 120.1(5)  | C3S-C1S-H1S    | 119.9     |
| C2S-C1S-H1S    | 119.9     | C3S-C2S-C1S    | 120.1(5)  |
| C3S-C2S-H2S    | 119.9     | C1S-C2S-H2S    | 119.9     |
| C2S-C3S-C1S    | 119.7(5)  | C2S-C3S-H3S    | 120.1     |
| C1S-C3S-H3S    | 120.1     |                |           |

## 4 Computational details

The minimum and transition states were located on Gaussian 16 software<sup>17</sup> with  $\omega$ B97XD<sup>18-19</sup> functional theory. In terms of basis set (BS1), 6-31G(d')<sup>20-22</sup> was used for H and C; LanL2DZ(d,p)<sup>23-</sup><sup>25</sup> and associated ECP was used for P, Si and Cl; and SDD (as defined in the G16 code) for Rh.<sup>26</sup> Frequency calculations were performed to obtain thermodynamic and kinetic values and to ensure that minima and transition states have zero and one imaginary frequency, respectively.

The geometries associated with the displacement of atoms along imaginary frequencies in the transition states were also located to verify the appropriate connected minima. Solvent effects also are included via single-point calculations utilizing gas-phase geometries with the SMD implicit solvation model.<sup>27</sup>

For the thermodynamic calculation of the monomer-dimer equilibria, a single-point calculation was performed using the  $\omega$ B97XD functional and the BS2 basis set. The optimized geometries of the complexes were used as input for these calculations. In the BS2 basis set, 6-311+G(2d,p) basis set is applied for C, H, P, Si, Cl atoms and SDD pseudo potential for Rh. The results for the monomer-dimer equilibria in Scheme 3 in the main text were reported at the  $\omega$ B97XD/BS2//BS1 level of theory.

### **Mechanistic possibilities**

The formation of the isomerized product **Rh-3** was explored from two starting materials: (1)  $[\text{RhCl}(\text{COD})]_2$  dimer and (2) **Rh-1**. In accordance with the experiment, the formation of **Rh-3** is more favorable to occur during the metalation process, e.g. directly from  $[\text{RhCl}(\text{COD})]_2$ .

### **Mechanism of formation of Rh-3 from $[\text{RhCl}(\text{COD})]_2$**

We propose a mechanism consisting of two main parts. Firstly, the formation of intermediate **Rh-8** occurs during metalation (**Figure S8**). From this intermediate, two competitive pathways arise, leading to the formation of **Rh-1** and its isomer, **Rh-3-mon**.



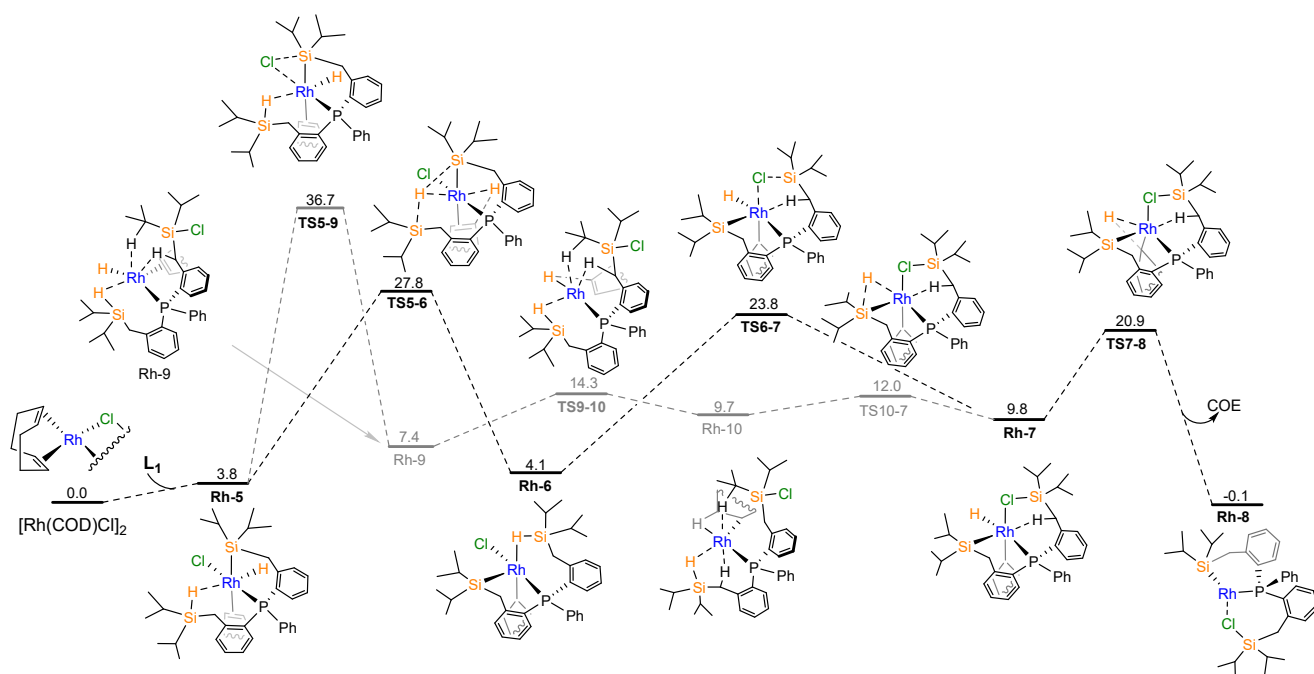

**Figure S8.** Gibbs free energy diagram at SMD(benzene)- $\omega$ B97XD// $\omega$ B97XD/BS1 level theory producing intermediate **Rh-8**

### Mechanism of formation of **Rh-3** from **Rh-1**

To study the isomerization process, at first, three possible paths were explored in the starting  $14e^-$  species **Rh-1**, see Figure S9. In this discussion, **Rh-1** is used as the reference energy point at 0.0 kcal/mol. Two  $\sigma$ -bond metathesis (SM) processes attempting to make Rh-C bond directly requires significant energy at **TS1-18**,  $\Delta^\ddagger G^\circ=53.5$  kcal/mol and **TS1-19**,  $\Delta^\ddagger G^\circ=40.9$  kcal/mol (Figure

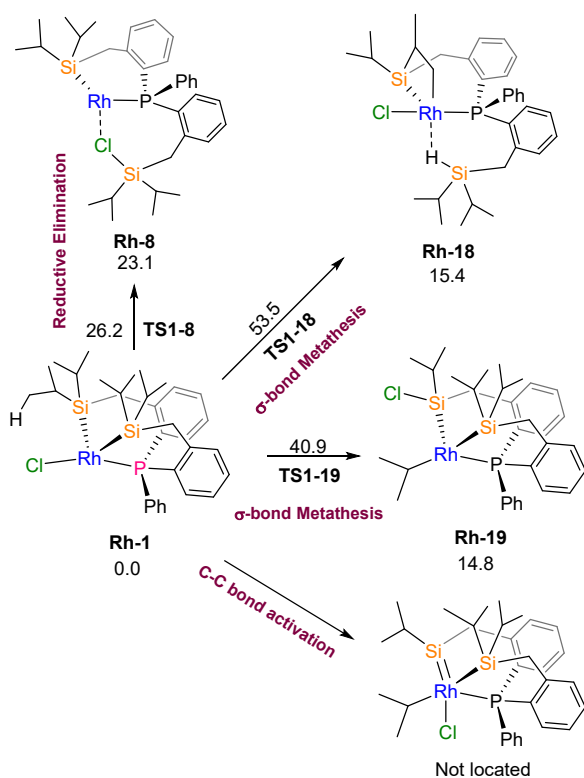

S9). A silylene intermediate is also proposed as this intermediate would result from C-C bond cleavage, but the geometry could not be located. The only viable energy pathway that was found is the reductive elimination (RE) step, **TS1-8**,  $\Delta^\ddagger G^\circ=26.2$  kcal/mol, which potentially initiates the isomerization process.

**Figure S9.** Exploring the reactivity of complex **Rh-1**. Calculated at  $\omega$ B97XD/BS1 level theory

The present study elucidates the transformation from an isopropyl silyl complex to a terminal *n*-propyl species, which can be summarized in six steps: reductive elimination (RE), oxidative addition (OA),  $\sigma$ -bond metathesis (SM),  $\sigma$ -bond metathesis (SM), reductive elimination (RE), and oxidative addition (OA), as illustrated in Figure S10. Following the first reductive elimination (RE) step, a Si-Cl bond is formed in the **Rh-8** complex, while Cl continues to serve as a ligand in the 14e<sup>-</sup> Rhodium(I) complex. There is another isomer in which an agostic interaction replaces the coordination of chlorine. This isomer, denoted as **Rh-11**, has a slightly higher energy of 1.1 kcal/mol compared to -0.1 kcal/mol in **Rh-8**.

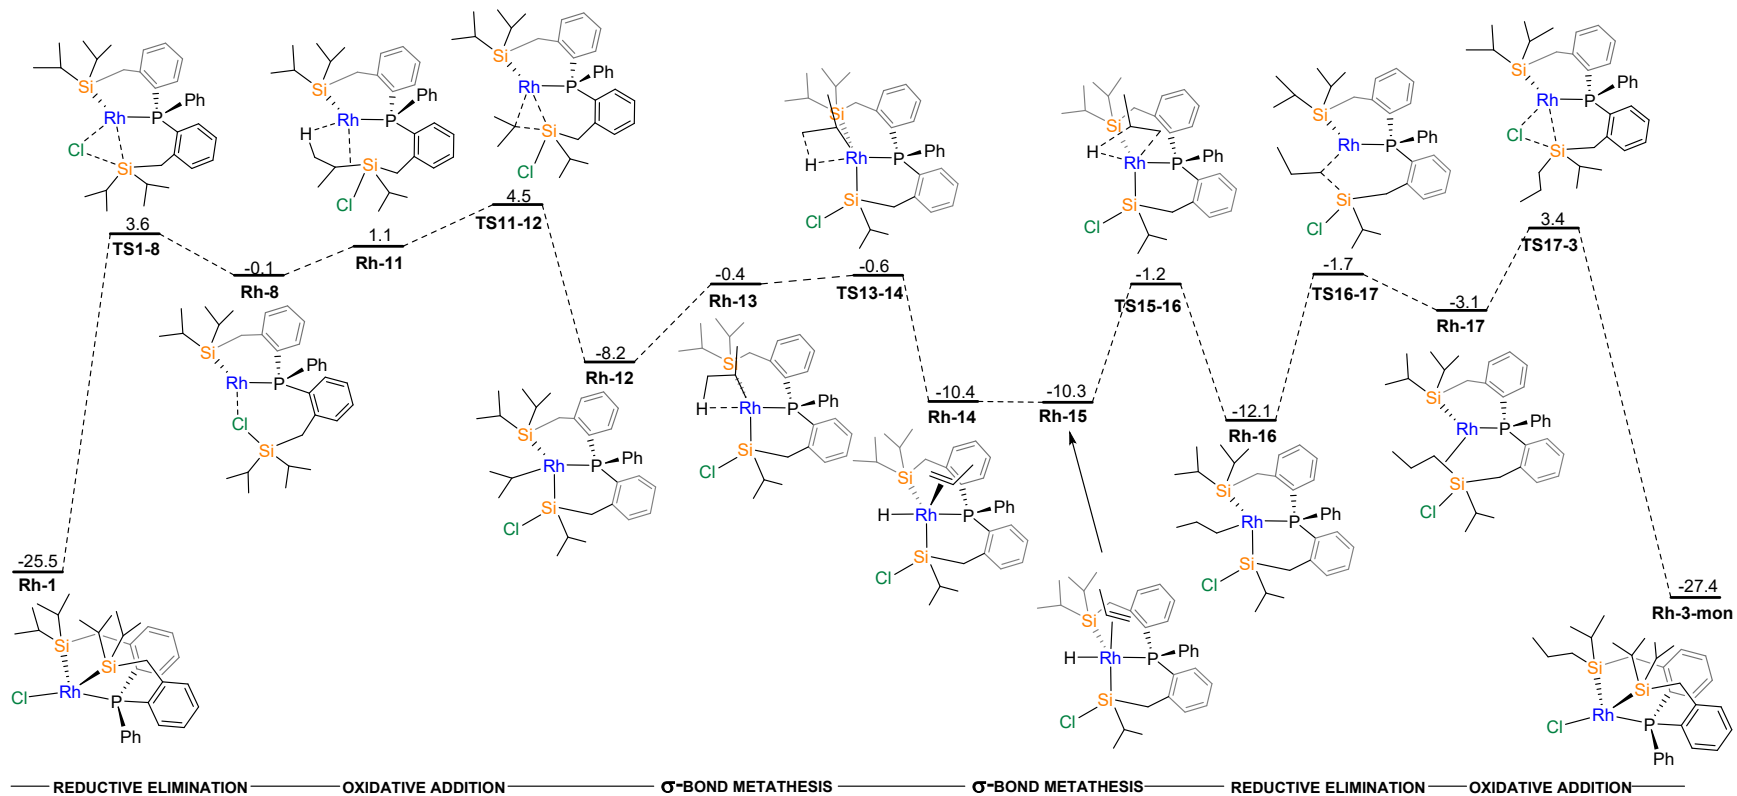

**Figure S10.** Gibbs free energy diagram (kcal/mol) for the isomerization process at SMD(benzene)- $\omega$ B97XD// $\omega$ B97XD/BS1 level theory.

This species with an agostic interaction accommodates the proper proximity to break the C-Si bond at **TS11-12** which is the rate determining step with  $\Delta\Delta^\ddagger G^\circ=30.0$  kcal/mol (energy gap between **TS11-12** and **Rh-1**). In this point, breaking the C-Si bond produces **Rh-12** where the Rh(III) center bonds to the isopropyl group. Next, a couple of  $\sigma$ -bond metathesis steps occur which isomerize the isopropyl ligand to the terminal propyl ligand. A  $\beta$ -hydride elimination step **TS13-14**,  $\Delta^\ddagger G^\circ=-0.6$  kcal/mol produces trigonal pyramidal hydride complex **Rh-14** followed by the conformer change on the alkene ligand which leads to minimum **Rh-15**. Then, the hydride returns to the alkyl chain via another  $\sigma$ -bond metathesis event, **TS15-16**,  $\Delta^\ddagger G^\circ=-1.2$  kcal/mol. The analogous metathesis computations performed on different isomers where the hydride and alkene ligand switch positions (the hydride is no longer located in the trans position to the phosphine ligand but instead to the alkene ligand) show a less favorable free energy of activation, see Figure S11.

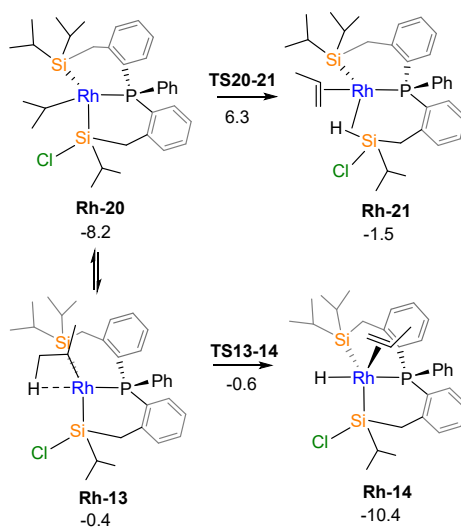

**Figure S11.** Energy comparison of  $\sigma$ -bond metathesis between two different isomers. Calculated at SMD(benzene)- $\omega$ B97XD// $\omega$ B97XD/BS1 level theory.

The relative energy of complex **Rh-17** is comparable to that of complex **Rh-8**, and the transformation of complex **Rh-17** to **Rh-3-mon** follows an analogous reverse pathway to that of the transformation from complex **Rh-1** to **Rh-8**. Typically, intermediates with terminal alkyl ligands exhibit slightly lower thermodynamic stability compared to those with branched alkyl ligands. As a result, the isomerization process is thermodynamically favorable, with an approximate energy difference of  $-1.9$  kcal/mol.

**Table S11.** Selected relative free Gibbs energy (kcal/mol) comparison between  $\omega$ B97XD/BS1 and SMD(benzene)- $\omega$ B97XD// $\omega$ B97XD/BS1 level theory.

| Complexes                      | $\omega$ B97XD/BS1 | SMD(Benzene)-<br>$\omega$ B97XD// $\omega$ B97XD/BS1 |
|--------------------------------|--------------------|------------------------------------------------------|
| <b>[Rh(COD)Cl]<sub>2</sub></b> | 0.0                | 0.0                                                  |
| <b>Rh-1</b>                    | -23.5              | -25.5                                                |
| <b>Rh-3-mon</b>                | -25.7              | -27.4                                                |
| <b>Rh-5</b>                    | 2.4                | 3.8                                                  |
| <b>Rh-6</b>                    | 3.9                | 4.1                                                  |
| <b>Rh-7</b>                    | 7.9                | 9.8                                                  |
| <b>Rh-8</b>                    | -0.4               | -0.1                                                 |
| <b>TS5-6</b>                   | 25.3               | 27.8                                                 |
| <b>TS6-7</b>                   | 20.2               | 23.8                                                 |
| <b>TS7-8</b>                   | 20.3               | 20.9                                                 |
| <b>TS1-8</b>                   | 2.7                | 3.6                                                  |
| <b>TS11-12</b>                 | 4.9                | 4.5                                                  |

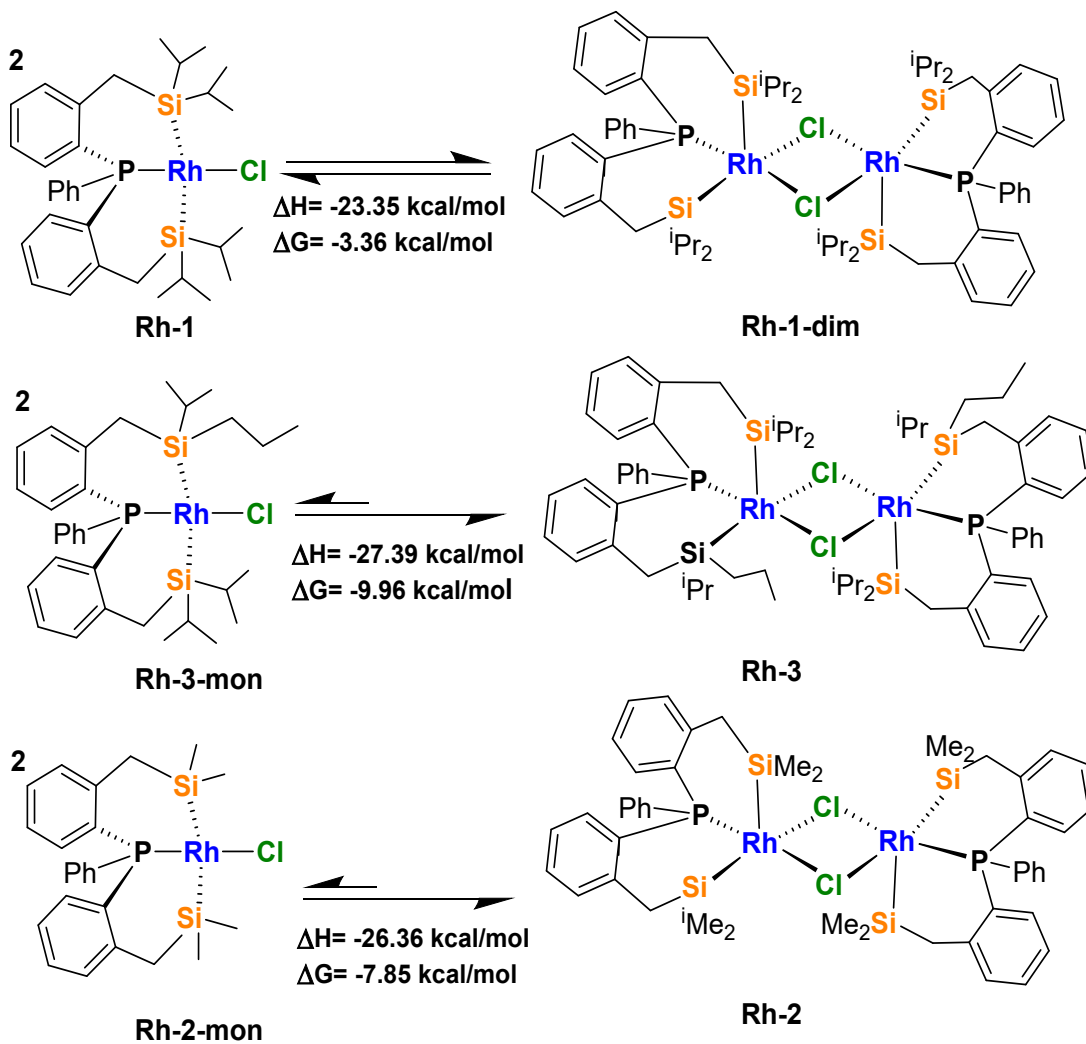

**Figure S12.** The monomer/dimer equilibria upon variation of the substituents on Si in ( $\kappa$ 3-Si,Si,P)RhCl complexes and the calculated energetic parameters (at the  $\omega$ B97XD/BS1 level of theory).

## 5 References

1. Giordano, G.; Crabtree, R. H.; Heintz, R. M.; Forster, D.; Morris, D. E., Di- $\mu$ -Chloro-Bis( $\eta^4$ -1,5-Cyclooctadiene) Dirhodium(I). In *Inorg. Synth.*, John Wiley & Sons, Inc.: 2007; pp 218-220.
2. Corona-González, M. V.; Zamora-Moreno, J.; Muñoz-Hernández, M. A.; Vendier, L.; Sabo-Etienne, S.; Montiel-Palma, V., Exploiting the Versatility of Phosphinobenzylsilanes for the Stabilization of 14-Electron Rhodium(III) and Iridium(III) Complexes. *European Journal of Inorganic Chemistry* **2019**, *2019* (13), 1854-1858.
3. Corey, J. Y., Reactions of Hydrosilanes with Transition Metal Complexes. *Chem. Rev.* **2016**, *116* (19), 11291-11435.
4. Corey, J. Y.; Braddock-Wilking, J., Reactions of Hydrosilanes with Transition-Metal Complexes: Formation of Stable Transition-Metal Silyl Compounds. *Chem. Rev.* **1999**, *99* (1), 175-292.
5. Corey, J. Y., Reactions of Hydrosilanes with Transition Metal Complexes and Characterization of the Products. *Chem. Rev.* **2011**, *111* (2), 863-1071.
6. Pham, E. K.; West, R., Platinum  $\eta^2$ -disilene complexes: syntheses, reactivity, and structures. *Organometallics* **1990**, *9* (5), 1517-1523.
7. Noda, H.; Tanaka, K.; Tanabe, M.; Osakada, K., Cyclic Platina(borasiloxane)s and Platina(siloxane)s and Their Chemical Properties. *Organometallics* **2018**, *37* (1), 22-29.
8. DeMott, J. C.; Gu, W.; McCulloch, B. J.; Herbert, D. E.; Goshert, M. D.; Walensky, J. R.; Zhou, J.; Ozerov, O. V., Silyl-Silylene Interplay in Cationic PSiP Pincer Complexes of Platinum. *Organometallics* **2015**, *34* (16), 3930-3933.
9. Korshin, E. E.; Leitus, G.; Shimon, L. J. W.; Konstantinovski, L.; Milstein, D., Silanol-Based Pincer Pt(II) Complexes: Synthesis, Structure, and Unusual Reactivity. *Inorganic Chemistry* **2008**, *47* (16), 7177-7189.
10. Feldman, J. D.; Peters, J. C.; Tilley, T. D., Activations of Silanes with  $[\text{PhB}(\text{CH}_2\text{PPh}_2)_3\text{Ir}(\text{H})(\eta^3\text{-C}_8\text{H}_{13})]$ . Formation of Iridium Silylene Complexes via the Extrusion of Silylenes from Secondary Silanes  $\text{R}_2\text{SiH}_2$ . *Organometallics* **2002**, *21* (20), 4065-4075.
11. Corona-Gonzalez, M. V.; Zamora-Moreno, J.; Cuevas-Chavez, C. A.; Rufino-Felipe, E.; Mothes-Martin, E.; Coppel, Y.; Munoz-Hernandez, M. A.; Vendier, L.; Flores-Alamo, M.; Grellier, M.; Sabo-Etienne, S.; Montiel-Palma, V., A family of rhodium and iridium complexes with semirigid benzylsilyl phosphines: from bidentate to tetradentate coordination modes. *Dalton Trans.* **2017**, *46* (27), 8827-8838.
12. Saint Program included in the package software: APEX4 v2021.4-0
13. Bruker (2001). Bruker AXS Inc., Madison, Wisconsin, USA.
14. SHELXT-Integrated space group and crystal -structure determination Sheldrick, G. M. *Acta Crystallogr., Sect. A* **2015**, *A71*, 3-8.
15. SHELXT Sheldrick, G. M. Ver. 2018/3. *Acta Crystallogr. Sect. C Structural Chemistry* **71**, 3-8.
16. APEX4 v2021, 4-0, AXS Bruker program.
17. Frisch, M. J.; Trucks, G. W.; Schlegel, H. B.; Scuseria, G. E.; Robb, M. A.; Cheeseman, J. R.; Scalmani, G.; Barone, V.; Petersson, G. A.; Nakatsuji, H.; Li, X.; Caricato, M.; Marenich, A. V.; Bloino, J.; Janesko, B. G.; Gomperts, R.; Mennucci, B.; Hratchian, H. P.; Ortiz, J. V.; Izmaylov, A. F.; Sonnenberg, J. L.; Williams, F.; Ding, F.; Lipparini, F.; Egidi, F.; Goings, J.; Peng, B.; Petrone, A.; Henderson, T.; Ranasinghe, D.; Zakrzewski, V. G.; Gao, J.; Rega, N.; Zheng, G.; Liang, W.; Hada, M.; Ehara, M.; Toyota, K.; Fukuda, R.; Hasegawa, J.; Ishida, M.; Nakajima, T.; Honda, Y.; Kitao, O.; Nakai, H.; Vreven, T.; Throssell, K.; Montgomery Jr., J. A.; Peralta, J. E.; Ogliaro, F.; Bearpark, M. J.; Heyd, J. J.; Brothers, E. N.; Kudin, K. N.; Staroverov, V. N.; Keith, T. A.; Kobayashi, R.; Normand, J.; Raghavachari, K.; Rendell, A. P.; Burant, J. C.; Iyengar, S. S.; Tomasi, J.; Cossi, M.; Millam, J. M.; Klene, M.; Adamo, C.; Cammi, R.; Ochterski, J. W.;

Martin, R. L.; Morokuma, K.; Farkas, O.; Foresman, J. B.; Fox, D. J. *Gaussian 16 Rev. C.01*, Wallingford, CT, 2016.

18. Chai, J. D.; Head-Gordon, M., Long-range corrected hybrid density functionals with damped atom-atom dispersion corrections. *PCCP* **2008**, *10* (44), 6615-20.
19. Chai, J. D.; Head-Gordon, M., Systematic optimization of long-range corrected hybrid density functionals. *The Journal of Chemical Physics* **2008**, *128* (8), 084106.
20. Hehre, W. J.; Ditchfield, R.; Pople, J. A., Self-Consistent Molecular Orbital Methods. XII. Further Extensions of Gaussian-Type Basis Sets for Use in Molecular Orbital Studies of Organic Molecules. *The Journal of Chemical Physics* **1972**, *56* (5), 2257-2261.
21. Hariharan, P. C.; Pople, J. A., The influence of polarization functions on molecular orbital hydrogenation energies. *Theoretica chimica acta* **1973**, *28* (3), 213-222.
22. Petersson, G. A.; Al-Laham, M. A., A complete basis set model chemistry. II. Open-shell systems and the total energies of the first-row atoms. *The Journal of Chemical Physics* **1991**, *94* (9), 6081-6090.
23. Hay, P. J.; Wadt, W. R., Ab initio effective core potentials for molecular calculations. Potentials for K to Au including the outermost core orbitals. *The Journal of Chemical Physics* **1985**, *82* (1), 299-310.
24. Hay, P. J.; Wadt, W. R., Ab initio effective core potentials for molecular calculations. Potentials for the transition metal atoms Sc to Hg. *The Journal of Chemical Physics* **1985**, *82* (1), 270-283.
25. Couty, M.; Hall, M. B., Basis sets for transition metals: Optimized outer p functions. *Journal of Computational Chemistry* **1996**, *17* (11), 1359-1370.
26. Andrae, D.; Häußermann, U.; Dolg, M.; Stoll, H.; Preuß, H., Energy-adjusted ab initio pseudopotentials for the second and third row transition elements. *Theoretica chimica acta* **1990**, *77* (2), 123-141.
27. Marenich, A. V.; Cramer, C. J.; Truhlar, D. G., Universal Solvation Model Based on Solute Electron Density and on a Continuum Model of the Solvent Defined by the Bulk Dielectric Constant and Atomic Surface Tensions. *The Journal of Physical Chemistry B* **2009**, *113* (18), 6378-6396.
